# Supplementary material for: Marine Metabolomics: a Method for Nontargeted Measurement of Metabolites in Seawater by Gas Chromatography–Mass Spectrometry
Source: PubMed Central journal article supplement (PMC6906741; doi:10.1128/msystems.00638-19), 2019-12-10

**A**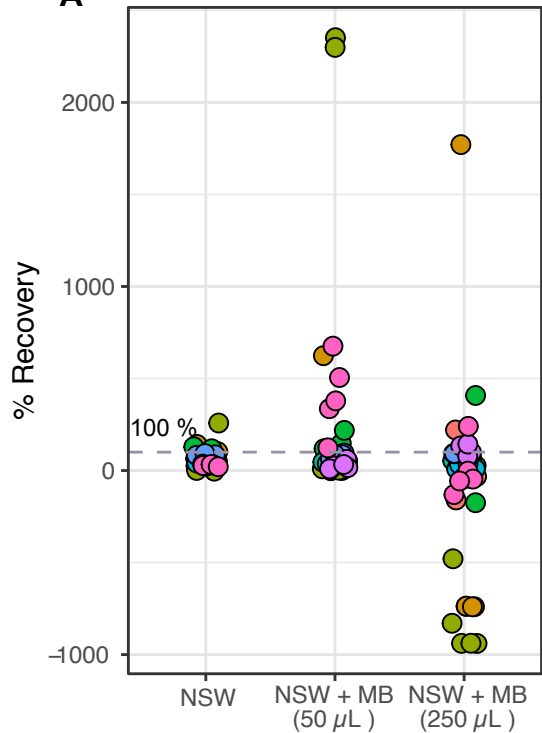**B**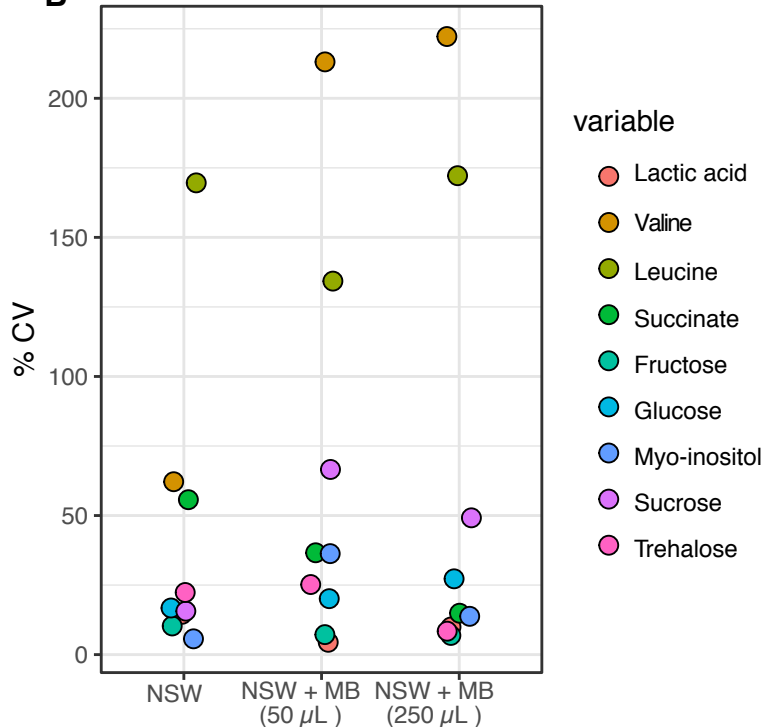

Supplement: mSystems.00638-19-sf004.pdf [file mSystems.00638-19-sf004.pdf]
