# Supplementary material for: Marine Metabolomics: a Method for Nontargeted Measurement of Metabolites in Seawater by Gas Chromatography–Mass Spectrometry
Source: PubMed Central journal article supplement (PMC6906741; doi:10.1128/msystems.00638-19), 2019-12-10
Supplement: mSystems.00638-19-st001.pdf [file mSystems.00638-19-st001.pdf]

| Nr. Detected | Metabolite standard            | Manufacture company | KEGG ID | BRITE hierarchy/<br>General category                 | Retention time (s) | Quant. ion | Qualifying ions | Mixture              |
|--------------|--------------------------------|---------------------|---------|------------------------------------------------------|--------------------|------------|-----------------|----------------------|
| 1            | Alanine                        | Fluka               | C00041  | Peptides; Amino acids; Common amino acids            | 531                | 218        | 116; 233; 258   | Method development*  |
|              | Arginine                       | Fluka               | C00062  | Peptides; Amino acids; Common amino acids            | Not detected       |            |                 | Method development   |
| 2            | Aspartic acid                  | Fluka               | C00049  | Peptides; Amino acids; Common amino acids            | 858                | 232        | 147; 218; 292   | Method development   |
|              | Carnitine                      | Fluka               | C00318  | Amino acid                                           | Not detected       |            |                 | Method development   |
|              | Citric acid                    | Fluka               | C00158  | Organic acids; Carboxylic acids; Tricarboxylic acids | Not detected       |            |                 | Method development*# |
|              | Cysteine                       | Fluka               | C00097  | Peptides; Amino acids; Common amino acids            | Not detected       |            |                 | Method development   |
| 3            | D-mannose                      | Biolog              | C00159  | Carbohydrates; Monosaccharides; Aldoses              | 1126               | 203        | 217; 301        | Method development   |
| 4            | D-ribose                       | Biolog              | C00121  | Carbohydrates; Monosaccharides; Aldoses              | 973                | 204        | 217; 147        | Method development   |
|              | Dimethylsulfo<br>niopropionate |                     | C04022  | Organic compound                                     | Not detected       |            |                 | Method development   |
| 5            | Fructose                       | Sigma-<br>Aldrich   | C00095  | Carbohydrates; Monosaccharides; Ketoses              | 1098               | 307        | 147; 217; 277   | Method development*# |

| <b>Nr. Detected</b> | <b>Metabolite standard</b> | <b>Manufacture company</b> | <b>KEGG ID</b> | <b>BRITE hierarchy/ General category</b>  | <b>Retention time (s)</b> | <b>Quant. ion</b> | <b>Qualifying ions</b> | <b>Mixture</b>       |
|---------------------|----------------------------|----------------------------|----------------|-------------------------------------------|---------------------------|-------------------|------------------------|----------------------|
| 6                   | Fumarate                   | Fluka                      | C00122         | Dicarboxylic acid                         | 727                       | 245               | 143; 147; 217          | Method development   |
| 7                   | Galactose                  | Sigma-Aldrich              | C00124         | Carbohydrates; Monosaccharides; Aldoses   | 1124                      | 319               | 147; 205; 217          | Method development   |
| 8                   | Glucose                    | AppliChem                  | C00031         | Carbohydrates; Monosaccharides; Aldoses   | 1120                      | 321               | 147; 160; 205          | Method development*# |
| 9                   | Glutamic acid              | Merck                      | C00025         | Peptides; Amino acids; Common amino acids | 929                       | 177               | 73; 147; 246           | Method development*# |
| 10                  | Glutamine                  | Merck                      | C00064         | Peptides; Amino acids; Common amino acids | 824                       |                   |                        | Method development * |
|                     | Glycerophosphate           | Merck                      | C00093         | Organic compound                          | Not detected              |                   |                        | Method development   |
| 11                  | Glycine                    | Fluka                      | C00037         | Peptides; Amino acids; Common amino acids | 689                       | 204               | 147; 174; 248          | Method development*# |
|                     | Histidine                  | Fluka                      | C00135         | Peptides; Amino acids; Common amino acids | Not detected              |                   |                        | Method development#  |
| 12                  | Isoleucine                 | Fluka                      | C00407         | Peptides; Amino acids; Common amino acids | 684                       | 232               | 147; 158; 218          | Method development   |
| 13                  | L-phenylalanine            | Biolog                     | C00079         | Peptides; Amino acids; Common amino acids | 897                       | 221               | 321; 147               | Method development   |

| <b>Nr. Detected</b> | <b>Metabolite standard</b> | <b>Manufacture company</b> | <b>KEGG ID</b> | <b>BRITE hierarchy/<br/>General category</b>                   | <b>Retention time (s)</b> | <b>Quant. ion</b> | <b>Qualifying ions</b> | <b>Mixture</b>       |
|---------------------|----------------------------|----------------------------|----------------|----------------------------------------------------------------|---------------------------|-------------------|------------------------|----------------------|
| 14                  | Lactic acid                | Fluka                      | C00186         | Organic acids;<br>Carboxylic acids;<br>Hydroxycarboxylic acids | 480                       | 193               | 117; 147;<br>191       | Method development*# |
| 15                  | Lauric acid                | Fluka                      | C002679        | Lipids; Fatty acids;<br>Saturated fatty acids                  | 955                       | 215               | 117; 201;<br>257       | Method development#  |
| 16                  | Leucine                    | Biolog                     | C00123         | Peptides; Amino acids;<br>Common amino acids                   | 598                       | 169               | 125; 95                | Method development*# |
| 17                  | Leucine                    | Biolog                     | C00123         | Peptides; Amino acids;<br>Common amino acids                   | 660                       | 177               | 86; 146;<br>188        | Method development   |
| 18                  | Lysine                     | Fluka                      | C00047         | Peptides; Amino acids;<br>Common amino acids                   | 1127                      | 174               | 218; 230;<br>317       | Method development*# |
| 19                  | Maleic acid                | Fluka                      | C01384         | Dicarboxylic acid                                              | 692                       | 245               | 73; 147;<br>215        | Method development*  |
| 20                  | Malic acid                 | Sigma-Aldrich              | C00149         | Organic acids;<br>Carboxylic acids;<br>Hydroxycarboxylic acids | 832                       | 233               | 147; 245;<br>307       | Method development#  |
| 21                  | Maltose                    | Sigma-Aldrich              | C00208         | Carbohydrates;<br>Oligosaccharides;<br>Disaccharides           | 1550                      | 361               | 204; 217;<br>319       | Method development   |
| 22                  | Mannitol                   | Fluka                      | C00392         | Carbohydrates;<br>Monosaccharides;<br>Sugar alcohols           | 1135                      | 319               | 147; 205;<br>217       | Method development   |

| <b>Nr. Detected</b> | <b>Metabolite standard</b> | <b>Manufacture company</b> | <b>KEGG ID</b> | <b>BRITE hierarchy/<br/>General category</b>        | <b>Retention time (s)</b> | <b>Quant. ion</b> | <b>Qualifying ions</b> | <b>Mixture</b>       |
|---------------------|----------------------------|----------------------------|----------------|-----------------------------------------------------|---------------------------|-------------------|------------------------|----------------------|
| 23                  | Methionine                 | Sigma-Aldrich              | C00073         | Peptides; Amino acids; Common amino acids           | 779                       | 221               | 104; 178; 206          | Method development   |
| 24                  | Methionine                 | Sigma-Aldrich              | C00073         | Peptides; Amino acids; Common amino acids           | 860                       | 176               | 128; 73                | Method development   |
| 25                  | Myo-inositol               | Fluka                      | C00137         | Carbohydrates; Monosaccharides; Sugar alcohols      | 1224                      | 305               | 147; 217; 305          | Method development*# |
| 26                  | NAG                        |                            | C00140         | Carbohydrates; monosaccharides; amino sugar         | 1223                      |                   |                        | Method development*  |
| 27                  | Ornithine                  |                            | C00077         | Amino acid                                          | 931/1064                  |                   |                        | Method development*# |
| 28                  | Oxalic Acid                |                            | C00209         | Dicarboxylic acid                                   | 558                       |                   |                        | Method development*  |
| 29                  | Proline                    |                            | C00148         | Peptides; Amino acids; Common amino acids           | 689                       | 216               | 142; 189; 244          | Method development   |
|                     | Pyruvate                   |                            | C00022         | Organic acid                                        | Not detected              |                   |                        | Method development   |
| 30                  | Serine                     | Fluka                      | C00065         | Peptides; Amino acids; Common amino acids           | 733                       | 204               | 73; 116; 132           | Method development*# |
| 31                  | Succinate                  | Merck                      | C00042         | Organic acids; Carboxylic acids; Dicarboxylic acids | 696                       | 262               | 129; 147; 247          | Method development*# |

| Nr. Detected | Metabolite standard | Manufacture company | KEGG ID | BRITE hierarchy/<br>General category                 | Retention time (s) | Quant. ion | Qualifying ions  | Mixture              |
|--------------|---------------------|---------------------|---------|------------------------------------------------------|--------------------|------------|------------------|----------------------|
| 32           | Sucrose             | Fluka               | C00089  | Carbohydrates;<br>Oligosaccharides;<br>Disaccharides | 1495               | 361        | 73; 147;<br>217  | Method development*# |
| 33           | Threonine           | Biolog              | C00188  | Peptides; Amino acids; Common amino acids            | 720                | 255        | 147; 219;<br>320 | Method development   |
| 34           | Threonine           | Biolog              | C00188  | Peptides; Amino acids; Common amino acids            | 756                | 291        | 147; 219;<br>320 | Method development   |
| 35           | Thymine             | Fluka               | C00178  | Nucleic acids;<br>Bases; Pyrimidine                  | 766                | 255        | 113; 147;<br>270 | Method development*# |
| 36           | Trehalose           | Fluka               | C01083  | Carbohydrates;<br>Oligosaccharides;<br>Disaccharides | 1543               | 377        | 147; 191;<br>217 | Method development*# |
| 37           | Tryptophan          |                     | C00078  | Peptides; Amino acids; Common amino acids            | 1289               |            |                  | Method development   |
| 38           | Urea                | Fluka               | C00086  | Organic compound                                     | 644                | 189        | 73; 147;<br>171  | Method development   |
| 39           | Valine              | Sigma-Aldrich       | C00183  | Peptides; Amino acids; Common amino acids            | 614                | 188        | 130; 146;<br>174 | Method development*# |
| 40           | 2-deoxy-D-ribose    | Biolog              | C01801  | Carbohydrates;<br>Monosaccharides;<br>Deoxy sugars   | 898                | 174        | 250; 100         | Database             |
| 41           | 2-hydroxybenzoi     | Biolog              | C00805  | Organic acid                                         | 737                | 146        | 103; 73          | Database             |
| 42           | 3-methyl            | Biolog              | NA      | Sugar                                                | 1086               | 204        | 217; 147         | Database             |

| <b>Nr. Detected</b> | <b>Metabolite standard</b>           | <b>Manufacture company</b> | <b>KEGG ID</b> | <b>BRITE hierarchy/<br/>General category</b>                | <b>Retention time (s)</b> | <b>Quant. ion</b> | <b>Qualifying ions</b> | <b>Mixture</b> |
|---------------------|--------------------------------------|----------------------------|----------------|-------------------------------------------------------------|---------------------------|-------------------|------------------------|----------------|
| 43                  | 4-hydroxybenzoi                      | Biolog                     | C00156         | Organic acid                                                | 941                       | 292               | 219; 189               | Database       |
| 44                  | Acetic acid                          |                            | C00033         | Organic acids;<br>Carboxylic acids;<br>Monocarboxylic acids | 509                       | 147               | 73; 137                | Database       |
| 45                  | Adenosine                            | Biolog                     | C00212         | Nucleic acids;<br>Nucleosides;<br>Ribonucleosides           | 1527                      | 361               | 204; 217               | Database       |
| 46                  | Beta-sitosterol                      | Biolog                     | C01753         | Lipids; Sterol lipids; Sterols                              | 1176                      | 333               | 292; 319               | Database       |
| 47                  | Capric acid                          | Biolog                     | C01571         | Lipids; Fatty acids;<br>Saturated fatty acids               | 823                       | 247               | 359; 147               | Database       |
| 48                  | Cellobiose                           |                            |                |                                                             | Cellobiose                |                   |                        | Database       |
| 49                  | Cholesterol                          | Sigma-Aldrich              | C00187         | Lipids; Sterol lipids; Sterols                              | 1717                      | 247               | 129; 329;<br>443       | Database#      |
| 50                  | Citraconic acid                      | Biolog                     | C02226         | Organic acid                                                | 733                       | 195               | 177; 120               | Database       |
| 51                  | Citramalic acid                      | Biolog                     | C00851         | Organic acid                                                | 827                       | 158               | 260; 68                | Database       |
| 52                  | Cysteine                             | Fluka                      | C00097         | Peptides; Amino acids; Common amino acids                   | 885                       | 220               | 147; 204;<br>246       | Database       |
| 53                  | D-arabinose                          | Biolog                     | C00216         | Carbohydrates;<br>Monosaccharides;<br>Aldoses               | 962                       | 307               | 217; 189               | Database       |
| 54                  | D-arabitol                           | Biolog                     | C01904         | Sugar alcohol                                               | 1001                      | 205               | 307; 319               | Database       |
| 55                  | D-galactonic acid- $\gamma$ -lactone | Biolog                     | NA             | Sugar                                                       | 1066                      | 261               | 217; 160               | Database       |

| Nr. Detected | Metabolite standard                 | Manufacture company | KEGG ID | BRITE hierarchy/<br>General category                 | Retention time (s) | Quant. ion | Qualifying ions | Mixture  |
|--------------|-------------------------------------|---------------------|---------|------------------------------------------------------|--------------------|------------|-----------------|----------|
| 56           | D-glucosamine                       | Biolog              | C00329  | Carbohydrates;<br>Monosaccharides;<br>Amino sugars   | 1141               | 217        | 307; 319        | Database |
| 57           | D-mannosamine                       | Biolog              | C03570  | Carbohydrates;<br>Monosaccharides;<br>Deoxy sugars   | 999                | 217        | 319; 205        | Database |
| 58           | D-melibiose                         | Biolog              | C05402  | Carbohydrates;<br>Oligosaccharides;<br>Disaccharides | 1764               | 363        | 469; 334        | Database |
| 59           | D-psicose                           | Biolog              | C06568  | Carbohydrates;<br>Monosaccharides;<br>Ketoses        | 1097               | 307        | 217; 277        | Database |
| 60           | D-tagatose                          | Biolog              | C00795  | Carbohydrates;<br>Monosaccharides;<br>Ketoses        | 1110               | 319        | 217; 205        | Database |
| 61           | D-tartaric acid                     | Biolog              | C02107  | Organic acid                                         | 948                | 252        | 281; 296        | Database |
| 62           | D-xylose                            | Biolog              | C00181  | Carbohydrates;<br>Monosaccharides;<br>Aldoses        | 959                | 217        | 307; 103        | Database |
| 63           | D,L-                                | Biolog              | C04227  | Organic compound                                     | 1200               | 333        | 292; 305        | Database |
| 64           | D,L- $\alpha$ -amino-N-butyric acid | Biolog              | NA      | Organic acid                                         | 516                | 177        | 205; 161        | Database |
| 65           | Dulcitol                            | Biolog              | C01697  | Sugar alcohol                                        | 1145               | 217        | 252; 233        | Database |
| 66           | Ergosterol                          | Biolog              | C01694  | Lipids; Sterol lipids; Sterols                       | 1784               | 485        | 394; 255        | Database |
| 67           | Ethanolamine                        | Biolog              | C00189  | Peptides; Amines;<br>Biogenic amines                 | 690                | 219        | 130; 117        | Database |

| <b>Nr. Detected</b> | <b>Metabolite standard</b> | <b>Manufacture company</b> | <b>KEGG ID</b> | <b>BRITE hierarchy/<br/>General category</b>         | <b>Retention time (s)</b> | <b>Quant. ion</b> | <b>Qualifying ions</b> | <b>Mixture</b> |
|---------------------|----------------------------|----------------------------|----------------|------------------------------------------------------|---------------------------|-------------------|------------------------|----------------|
| 68                  | Gentiobiose                | Biolog                     | C08240         | Carbohydrates;<br>Oligosaccharides;<br>Disaccharides | 1593                      | 361               | 345; 217               | Database       |
| 69                  | Gly-Glu                    | Biolog                     | NA             | Dipeptide                                            | 1193                      | 267               | 174; 426               | Database       |
| 70                  | Glycolic acid              | Biolog                     | C00160         | Organic acid                                         | 528                       | 174               | 202; 116               | Database       |
| 71                  | Hydroxy-L-proline          | Biolog                     | C01157         | Peptides; Amino acids;<br>Other amino acids          | 849                       | 307               | 205; 217               | Database       |
| 72                  | I-Erythritol               | Biolog                     | C00503         | Sugar alcohol                                        | 869                       | 304               | 174; 147               | Database       |
| 73                  | Itaconic acid              | Biolog                     | C00490         | Dicarboxylic acid                                    | 729                       | 147               | 259; 73                | Database       |
| 74                  | L-arabinose                | Biolog                     | C00259         | Carbohydrates;<br>Monosaccharides;<br>Aldoses        | 969                       | 217               | 307; 277               | Database       |
| 75                  | L-arabitol                 | Biolog                     | C00532         | Sugar alcohol                                        | 1002                      | 319               | 307; 205               | Database       |
| 76                  | L-fucose                   | Biolog                     | C01019         | Carbohydrates;<br>Monosaccharides;<br>Deoxy sugars   | 1015                      | 174               | 214; 200               | Database       |
| 77                  | L-homoserine               | Biolog                     | C00263         | Peptides; Amino acids;<br>Other amino acids          | 816                       | 229               | 117; 129               | Database       |
| 78                  | L-lyxose                   | Biolog                     | C01508         | Carbohydrates;<br>Monosaccharides;<br>Aldoses        | 956                       | 217               | 307; 189               | Database       |
| 79                  | L-rhamnose                 | Biolog                     | C00507         | Carbohydrates;<br>Monosaccharides;<br>Deoxy sugars   | 1032                      | 189               | 217; 147               | Database       |
| 80                  | L-sorbose                  | Biolog                     | C00247         | Carbohydrates;<br>Monosaccharides;<br>Ketoses        | 1113                      | 204               | 217; 147               | Database       |



| <b>Nr. Detected</b> | <b>Metabolite standard</b> | <b>Manufacture company</b> | <b>KEGG ID</b> | <b>BRITE hierarchy/<br/>General category</b>       | <b>Retention time (s)</b> | <b>Quant. ion</b> | <b>Qualifying ions</b> | <b>Mixture</b> |
|---------------------|----------------------------|----------------------------|----------------|----------------------------------------------------|---------------------------|-------------------|------------------------|----------------|
| 81                  | Lactitol                   | Biolog                     | NA             | Sugar alcohol                                      | 1584                      | 361               | 204; 217               | Database       |
| 82                  | Lactulose                  | Biolog                     | C07064         | Sugar                                              | 1553                      | 307               | 361; 217               | Database       |
| 83                  | m-hydroxyphenylacetic acid | Biolog                     | NA             | Organic acid                                       | 939                       | 174               | 318; 200               | Database       |
| 84                  | Maltitol                   | Biolog                     | NA             | Sugar alcohol                                      | 1596                      | 361               | 217; 204               | Database       |
| 85                  | Mucic acid                 | Biolog                     | C00879         | Organic acid                                       | 1217                      | 378               | 319; 246               | Database       |
| 86                  | N-acetyl-D-galactosamine   | Biolog                     | C01132         | Carbohydrates;<br>Monosaccharides;<br>Amino sugars | 1505                      | 230               | 245; 217               | Database       |
| 87                  | N-acetyl-D-glucosamine     | Biolog                     | C00140         | Carbohydrates;<br>Monosaccharides;<br>Amino sugars | 1234                      | 319               | 205; 333               | Database       |
| 88                  | N-acetyl-D-glucosaminitol  | Biolog                     | C00140         | Carbohydrates;<br>Monosaccharides;<br>Amino sugars | 1220                      | 319               | 205; 202               | Database       |
| 89                  | N-acetyl-β-D-galactosamine | Biolog                     | NA             | Sugar                                              | 1221                      | 205               | 319; 274               | Database       |
| 90                  | N-butylamine               | Biolog                     | C18706         | Organic compound                                   | 555                       | 205               | 190; 233               | Database       |
| 91                  | Ornithine                  | Merck                      | C00077         | Peptides; Amino acids; Other amino                 | 1061                      | 162               | 73; 142; 174           | Database       |

| <b>Nr. Detected</b> | <b>Metabolite standard</b> | <b>Manufacture company</b> | <b>KEGG ID</b> | <b>BRITE hierarchy/<br/>General category</b>                              | <b>Retention time (s)</b> | <b>Quant. ion</b> | <b>Qualifying ions</b> | <b>Mixture</b> |
|---------------------|----------------------------|----------------------------|----------------|---------------------------------------------------------------------------|---------------------------|-------------------|------------------------|----------------|
| 92                  | p-hydroxyphenylacetic Acid | Biolog                     | NA             | Organic acid                                                              | 949                       | 217               | 147; 307               | Database       |
| 93                  | Palatinose                 | Biolog                     | C01742         | Carbohydrates;<br>Oligosaccharides;<br>Disaccharides                      | 1603                      | 361               | 204; 217               | Database       |
| 94                  | Phenylethylamine           | Biolog                     | C05332         | Peptides; Amines;<br>Biogenic amines                                      | 899                       | 247               | 203; 147               | Database       |
| 95                  | Propionic acid             |                            | C00163         | Organic acids;<br>Carboxylic acids;<br>Monocarboxylic acids               | 497                       | 147               | 117; 191               | Database       |
| 96                  | Putrescine                 | Biolog                     | C00134         | Peptides; Amines;<br>Biogenic amines                                      | 1017                      | 117               | 133; 160               | Database       |
| 97                  | Sebacic acid               | Biolog                     | C08277         | Lipids; Fatty acyls;<br>Fatty acids and conjugates;<br>Dicarboxylic acids | 1116                      | 319               | 205; 217               | Database       |
| 98                  | Sorbic acid                | Biolog                     | NA             | Organic acid                                                              | 665                       | 174               | 147; 100               | Database       |
| 99                  | Sorbitol                   | Merck                      | C00794         | Carbohydrates;<br>Monosaccharides;<br>Sugar alcohols                      | 1134                      | 319               | 205; 217;<br>307       | Database       |
| 100                 | Stigmasterol               | Biolog                     | C05442         | Lipids; Sterol lipids;<br>Sterols                                         | 1814                      | 357               | 396; 487               | Database       |
| 101                 | Turanose                   | Biolog                     | C19636         | Carbohydrates;<br>Oligosaccharides;<br>Disaccharides                      | 1561                      | 361               | 345; 319               | Database       |

| Nr. Detected | Metabolite standard            | Manufacture company | KEGG ID | BRITE hierarchy/<br>General category                           | Retention time (s) | Quant. ion | Qualifying ions | Mixture  |
|--------------|--------------------------------|---------------------|---------|----------------------------------------------------------------|--------------------|------------|-----------------|----------|
| 102          | Uracil                         | Biolog              | C00106  | Nucleic acids;<br>Bases; Pyrimidine                            | 724                | 259        | 215; 147        | Database |
| 103          | $\alpha$ -D-Lactose            | Biolog              | C00243  | Carbohydrates;<br>Oligosaccharides;<br>Disaccharides           | 1530               | 361        | 217; 204        | Database |
| 104          | $\alpha$ -hydroxybutyri        | Biolog              | NA      | Organic acid                                                   | 578                | 191        | 233; 147        | Database |
| 105          | $\alpha$ -hydroxyglutari       | Biolog              | NA      | Organic acid                                                   | 927                | 296        | 281; 164        | Database |
| 106          | $\alpha$ -methyl-D-galactoside | Biolog              | NA      | Sugar                                                          | 1095               | 307        | 217; 103        | Database |
| 107          | $\beta$ -D-allose              | Biolog              | NA      | Aldohexose sugar                                               | 1111               | 205        | 189; 147        | Database |
| 108          | $\beta$ -hydroxybutyric acid   | Biolog              | C01089  | Organic acids;<br>Carboxylic acids;<br>Hydroxycarboxylic acids | 580                | 86         | 188; 75         | Database |
| 109          | $\beta$ -methyl-D-glucoside    | Biolog              | NA      | Sugar                                                          | 1113               | 331        | 215; 129        | Database |
| 110          | $\beta$ -methyl-D-glucuronic   | Biolog              | NA      | Sugar                                                          | 1173               | 292        | 305; 319        | Database |
| 111          | $\beta$ -methyl-D-xyloside     | Biolog              | NA      | Sugar                                                          | 997                | 205        | 319; 147        | Database |
| 112          | $\gamma$ -aminobutyric acid    | Biolog              | C00334  | Peptides; Amino acids; Other amino acids                       | 897                | 120        | 146; 91         | Database |

| Nr. Detected | Metabolite standard            | Manufacture company | KEGG ID | BRITE hierarchy/<br>General category                                                                                                                 | Retention time (s) | Quant. ion | Qualifying ions | Mixture  |
|--------------|--------------------------------|---------------------|---------|------------------------------------------------------------------------------------------------------------------------------------------------------|--------------------|------------|-----------------|----------|
| 113          | $\delta$ -amino-N-valeric acid | Biolog              | C00803  | Organic acid;<br>Carboxylic acid;<br>Monocarboxylic acids/<br>ALT: Lipids;<br>Fatty acyls; Fatty acid sand<br>conjugates; Straight chain fatty acids | 941                | 267        | 223; 193        | Database |
|              |                                |                     |         |                                                                                                                                                      |                    |            |                 |          |
|              | *Salt-water                    |                     |         |                                                                                                                                                      |                    |            |                 |          |
|              | # Detection limits             |                     |         |                                                                                                                                                      |                    |            |                 |          |
