# Supplementary material for: Marine Metabolomics: a Method for Nontargeted Measurement of Metabolites in Seawater by Gas Chromatography–Mass Spectrometry
Source: PubMed Central journal article supplement (PMC6906741; doi:10.1128/msystems.00638-19), 2019-12-10
Supplement: mSystems.00638-19-st003.pdf [file mSystems.00638-19-st003.pdf]

| Compound class                                  | Sample pre-treatment                                     | Detection method                                                                            | Limit of detection | Amount of sample required | Ref      |
|-------------------------------------------------|----------------------------------------------------------|---------------------------------------------------------------------------------------------|--------------------|---------------------------|----------|
| Amino acids                                     | o-phthalaldehyde/<br>2-mercaptoethanol<br>derivatization | High performance<br>liquid<br>chromatography                                                | fM                 | 25 µL                     | <b>1</b> |
| Sugars:<br>Monosaccharides<br>and disaccharides | Acid hydrolysis,<br>desalting                            | High performance<br>anion exchange<br>chromatography-<br>pulsed<br>amperometric<br>detector | nM                 | ~12 mL                    | <b>2</b> |
| Sterols                                         | Derivatization                                           | GC-MS                                                                                       | nM                 | 1 L                       | <b>3</b> |
|                                                 | Solid phase<br>extraction                                | LC/ESI-MS/MS                                                                                | pM                 | 5 L                       | <b>4</b> |

|               |                                                              |                                                      |    |      |      |
|---------------|--------------------------------------------------------------|------------------------------------------------------|----|------|------|
| Fatty acids   | Solvent extraction                                           | GC-MS                                                | μM | 90 L | 5, 6 |
| Organic acids | Derivatization with 2-nitrophenyl hydrazine and carbodiimine | High pressure liquid chromatography with ion pairing | nM | 2 mL | 7    |

1 Lindroth P & Mopper K (1979) High performance liquid chromatographic determination of subpicomole amounts of amino acids by precolumn fluorescence derivatization with o-Phthaldialdehyde. *Anal Chem* 51(11):1667-1674.

2 Engel A & Händel N (2011) A novel protocol for determining the concentration and composition of sugars in particulate and in high molecular weight dissolved organic matter (HMW-DOM) in seawater. *Mar Chem* 127(1-4):180-191.

3 Rocha MJ, Cruzeiro C, & Rocha E (2013) Development and validation of a GC-MS method for the evaluation of 17 endocrine disruptor compounds, including phytoestrogens and sitosterol, in coastal waters - their spatial and seasonal levels in Porto costal region (Portugal). *J Water Health* 11(2):281-296.

- 4 Ronan JM & McHugh B (2013) A sensitive liquid chromatography/tandem mass spectrometry method for the determination of natural and synthetic steroid estrogens in seawater and marine biota, with a focus on proposed Water Framework Directive Environmental Quality Standards. *Rapid Commun Mass Spectrom* 27(7):738-746.
- 5 Kennicutt MC & Jeffrey LM (1981) Chemical and GC-MS characterization of marine dissolved lipids. *Mar Chem* 10:367-387.
- 6 Mannino A & Harvey HR (1999) Lipid composition in particulate and dissolved organic matter in the Delaware Estuary: Sources and diagenetic patterns. *Geochimica et Cosmochimica Acta* 63(15):2219-2235.
- 7 Albert DB & Martens CS (1997) Determination of low-molecular-weight organic acid concentrations in seawater and pore-water samples via HPLC *Mar Chem* 56:27-37.
