# Supplementary material for: Marine Metabolomics: a Method for Nontargeted Measurement of Metabolites in Seawater by Gas Chromatography–Mass Spectrometry
Source: PubMed Central journal article supplement (PMC6906741; doi:10.1128/msystems.00638-19), 2019-12-10
Supplement: mSystems.00638-19-st004.pdf [file mSystems.00638-19-st004.pdf]

|    | A          | B                                              | C      | D                  | E                      | F                                | G                |
|----|------------|------------------------------------------------|--------|--------------------|------------------------|----------------------------------|------------------|
| 1  | CAS        | AMDIS Annotation                               | RT (s) | Environment        | Kovats retention index | Golm predicted functional groups | BinBase splashID |
| 2  | 71144359   | >Benzaldehyde, 3-fluoro-4,5-dihydroxy-         | 441    | Coraline Sediments |                        |                                  |                  |
| 3  | 4325853    | >Tris(trimethylsilyl)borate                    | 442    | Coraline Sediments |                        |                                  |                  |
| 4  | 81834517   | >Cyclopentene, 3-methyl-1-(trimethylsilyloxy)- | 445    | Coraline Sediments |                        |                                  |                  |
| 5  | 13368428   | (Trimethylsilyl)morpholine                     | 455    | Coraline Sediments |                        |                                  |                  |
| 6  | 108758     | >Pyridine, 2,4,6-trimethyl-                    | 456    | Coraline Sediments |                        |                                  |                  |
| 7  | 360952     | Trifluoroacetylmorpholine                      | 460    | Coraline Sediments |                        |                                  |                  |
| 8  | 13871891   | >Silane, (cyclohexyloxy)trimethyl-             | 462    | Coraline Sediments |                        |                                  |                  |
| 9  | EPA-366582 | >Tris(trimethylsilyl)carbamate                 | 471    | Coraline Sediments |                        |                                  |                  |
| 10 | 2116907    | >N-trimethylsilylaziridine                     | 471    | Coraline Sediments |                        |                                  |                  |
| 11 | 141628     | >Tetrasiloxane, decamethyl-                    | 476    | Coraline Sediments |                        |                                  |                  |
| 12 | 94533627   | 1,2-di-furan-2-yl-ethane-1,2-diamine           | 481    | Coraline Sediments |                        |                                  |                  |
| 13 | 2672573    | Benzenetricarboxylic acid, trimethyl ester     | 484    | Coraline Sediments |                        |                                  |                  |
| 14 | 141628     | >Tetrasiloxane, decamethyl-                    | 489    | Coraline Sediments |                        |                                  |                  |

|    | A          | B                                                                                           | C      | D                    | E                      | F                                | G                |
|----|------------|---------------------------------------------------------------------------------------------|--------|----------------------|------------------------|----------------------------------|------------------|
| 1  | CAS        | AMDIS Annotation                                                                            | RT (s) | Environment          | Kovats retention index | Golm predicted functional groups | BinBase splashID |
| 15 | EPA-322566 | Diethyl(trimethylsilyl)carbamate                                                            | 495    | Coraline Sediments   |                        |                                  |                  |
| 16 | 17596962   | >Propanoic acid, 2-[(trimethylsilyl)oxy]-, trimethylsilyl ester                             | 496    | Coraline Sediments * |                        |                                  |                  |
| 17 | 107460     | >Disiloxane, hexamethyl-                                                                    | 500    | Coraline Sediments   |                        |                                  |                  |
| 18 | 107517     | >Trisiloxane, octamethyl-                                                                   | 501    | Coraline Sediments   |                        |                                  |                  |
| 19 | EPA-318498 | phenyl-2,5-dihydro-pyrazolo[3,4-d]pyridazin-4-one                                           | 504    | Coraline Sediments   |                        |                                  |                  |
| 20 | 33581770   | [(trimethylsilyl)oxy]-, trimethylsilyl ester                                                | 508    | Coraline Sediments * |                        |                                  |                  |
| 21 | 27844071   | (trimethylsilyl)-, trimethylsilyl ester                                                     | 530    | Coraline Sediments   |                        |                                  |                  |
| 22 | 74733996   | Methoxyethoxy]ethoxy-1,3-dioxalane                                                          | 530    | Coraline Sediments   |                        |                                  |                  |
| 23 | 18394042   | >n-Butylamine, N,N-bis(trimethylsilyl)                                                      | 534    | Coraline Sediments   |                        |                                  |                  |
| 24 | 83239150   | trimethylsilyloxy-1-(trimethylsilyloxymethyl)ethyl]-5-[(2-trimethylsilyloxy-1-oxopropyl)-N- | 552    | Coraline Sediments   |                        |                                  |                  |
| 25 | 33581770   | [(trimethylsilyl)oxy]-, trimethylsilyl ester                                                | 559    | Coraline Sediments   |                        |                                  |                  |

|    | A          | B                                                                        | C      | D                     | E                      | F                                | G                |
|----|------------|--------------------------------------------------------------------------|--------|-----------------------|------------------------|----------------------------------|------------------|
| 1  | CAS        | AMDIS Annotation                                                         | RT (s) | Environment           | Kovats retention index | Golm predicted functional groups | BinBase splashID |
| 26 | 55162328   | >Propanoic acid, 3-<br>[[trimethylsilyl]oxy]-,<br>trimethylsilyl ester   | 562    | Coraline<br>Sediments |                        |                                  |                  |
| 27 | 55517389   | bis[[trimethylsilyl]oxy]-,<br>trimethylsilyl ester                       | 563    | Coraline<br>Sediments |                        |                                  |                  |
| 28 | 1873887    | >1,1,1,3,5,5,5-<br>Heptamethyltrisiloxane                                | 571    | Coraline<br>Sediments |                        |                                  |                  |
| 29 | 141639     | >Pentasiloxane,<br>dodecamethyl-                                         | 581    | Coraline<br>Sediments |                        |                                  |                  |
| 30 | 141639     | >Pentasiloxane,<br>dodecamethyl-                                         | 613    | Coraline<br>Sediments |                        |                                  |                  |
| 31 | EPA-332247 | >2-Ketobutyric acid eo-<br>tms                                           | 621    | Coraline<br>Sediments |                        |                                  |                  |
| 32 | 141639     | >Pentasiloxane,<br>dodecamethyl-                                         | 628    | Coraline<br>Sediments |                        |                                  |                  |
| 33 | 62185584   | >3,6,9,12-Tetraoxa-2,13-<br>disilatetradecane,<br>2,2,13,13-tetramethyl- | 642    | Coraline<br>Sediments |                        |                                  |                  |
| 34 | 1184787    | >Methanamine, N,N-<br>dimethyl-, N-oxide                                 | 643    | Coraline<br>Sediments |                        |                                  |                  |
| 35 | 75732411   | dimethylethyl)dimethyl-<br>benzoate                                      | 650    | Coraline<br>Sediments |                        |                                  |                  |
| 36 | 128649365  | >4-Chlorophenyl acridine-<br>9-carboxylate                               | 656    | Coraline<br>Sediments |                        |                                  |                  |
| 37 | 55606741   | bis[[trimethylsilyl]oxy]ph<br>enyl]ethyl]-1,1,1-<br>trimethyl-N-         | 663    | Coraline<br>Sediments |                        |                                  |                  |

|    | A          | B                                                          | C      | D                    | E                      | F                                | G                |
|----|------------|------------------------------------------------------------|--------|----------------------|------------------------|----------------------------------|------------------|
| 1  | CAS        | AMDIS Annotation                                           | RT (s) | Environment          | Kovats retention index | Golm predicted functional groups | BinBase splashID |
| 38 | 6787106    | >Glycerol, tris(trimethylsilyl) ether                      | 666    | Coraline Sediments * |                        |                                  |                  |
| 39 | 56484516   | >2-Ethyl-2-phenyl-1,3-benzodioxole                         | 667    | Coraline Sediments   |                        |                                  |                  |
| 40 | 4282422    | >Nonane, 1-iodo-                                           | 674    | Coraline Sediments   |                        |                                  |                  |
| 41 | EPA-344400 | bromo-4-fluorophenyl heptyl ester                          | 689    | Coraline Sediments   |                        |                                  |                  |
| 42 | 5630820    | bis(trimethylsilyl)-, trimethylsilyl ester                 | 695    | Coraline Sediments   |                        |                                  |                  |
| 43 | 40309577   | >Butanedioic acid, bis(trimethylsilyl) ester               | 699    | Coraline Sediments * |                        |                                  |                  |
| 44 | 38166006   | methyl-2,3-bis[(trimethylsilyl)oxy]-, trimethylsilyl ester | 703    | Coraline Sediments*  |                        |                                  |                  |
| 45 | 55557261   | methyl-, bis(trimethylsilyl) ester                         | 709    | Coraline Sediments   |                        |                                  |                  |
| 46 | EPA-315373 | >Phthalic acid, di(3-methylphenyl) ester                   | 724    | Coraline Sediments   |                        |                                  |                  |
| 47 | 625558     | >Formic acid, 1-methylethyl ester                          | 791    | Coraline Sediments   |                        |                                  |                  |
| 48 | 71167538   | dimethoxycarbonyl-N-methylisoxazolidine                    | 804    | Coraline Sediments   |                        |                                  |                  |
| 49 | 19693755   | >2-Methoxy-1,3-dioxolane                                   | 823    | Coraline Sediments   |                        |                                  |                  |
| 50 | EPA-352084 | Ethoxyethoxy]ethoxy]ethoxy-trimethylsilane                 | 846    | Coraline Sediments   |                        |                                  |                  |

|    | A          | B                                                                 | C      | D                   | E                      | F                                | G                |
|----|------------|-------------------------------------------------------------------|--------|---------------------|------------------------|----------------------------------|------------------|
| 1  | CAS        | AMDIS Annotation                                                  | RT (s) | Environment         | Kovats retention index | Golm predicted functional groups | BinBase splashID |
| 51 | EPA-226776 | >Bis(ethylthio) difluoromethane                                   | 849    | Coraline Sediments  |                        |                                  |                  |
| 52 | 10416736   | >Trimethyl(2,6 ditert.-butylphenoxy)silane                        | 876    | Coraline Sediments  |                        |                                  |                  |
| 53 | 25523142   | >3,3-Dichloropropyne                                              | 930    | Coraline Sediments  |                        |                                  |                  |
| 54 | 38316813   | (diphenylphosphino)phenyl-C,P]bis(triphenylphosphine)-, (SP-4-2)- | 936    | Coraline Sediments  |                        |                                  |                  |
| 55 | 35223      | pentakis(trimethylsilyl) ether                                    | 1003   | Coraline Sediments  |                        |                                  |                  |
| 56 | 64096817   | >Propanoic acid, 2-acetylhydrazono-                               | 1021   | Coraline Sediments  |                        |                                  |                  |
| 57 | 62185584   | >3,6,9,12-Tetraoxa-2,13-disilatetradecane, 2,2,13,13-tetramethyl- | 1028   | Coraline Sediments  |                        |                                  |                  |
| 58 | EPA-380115 | >D-(-)-Ribofuranose, tetrakis(trimethylsilyl) ether (isomer 1)    | 1032   | Coraline Sediments  |                        |                                  |                  |
| 59 | 49647394   | bis[3-phenylpropyl]pteridine                                      | 1048   | Coraline Sediments* |                        |                                  |                  |
| 60 | 55517389   | bis[(trimethylsilyl)oxyl]-, trimethylsilyl ester                  | 1074   | Coraline Sediments  |                        |                                  |                  |
| 61 | 18603173   | >Tetradecanoic acid, trimethylsilyl ester                         | 1085   | Coraline Sediments  |                        |                                  |                  |

|    | A          | B                                                                 | C      | D                   | E                      | F                                | G                |
|----|------------|-------------------------------------------------------------------|--------|---------------------|------------------------|----------------------------------|------------------|
| 1  | CAS        | AMDIS Annotation                                                  | RT (s) | Environment         | Kovats retention index | Golm predicted functional groups | BinBase splashID |
| 62 | EPA-380134 | pentakis(trimethylsilyl) ether                                    | 1092   | Coraline Sediments* |                        |                                  |                  |
| 63 | 56196146   | pentakis-O-(trimethylsilyl)-, O-                                  | 1102   | Coraline Sediments* |                        |                                  |                  |
| 64 |            | Galactose                                                         | 1112   | Coraline Sediments* |                        |                                  |                  |
| 65 | 14317078   | hexakis-O-(trimethylsilyl)-                                       | 1133   | Coraline Sediments  |                        |                                  |                  |
| 66 | 14317078   | hexakis-O-(trimethylsilyl)-                                       | 1138   | Coraline Sediments* |                        |                                  |                  |
| 67 | EPA-283555 | (4-trimethoxysilyloxy)propa                                       | 1145   | Coraline Sediments  |                        |                                  |                  |
| 68 | 62185584   | >3,6,9,12-Tetraoxa-2,13-disilatetradecane, 2,2,13,13-tetramethyl- | 1187   | Coraline Sediments  |                        |                                  |                  |
| 69 | 55520893   | >Hexadecanoic acid, trimethylsilyl ester                          | 1204   | Coraline Sediments  |                        |                                  |                  |
| 70 | 75763      | >Silane, tetramethyl-                                             | 1243   | Coraline Sediments  |                        |                                  |                  |
| 71 | EPA-363741 | diethylhexyloxytridecyloxy-                                       | 1300   | Coraline Sediments  |                        |                                  |                  |
| 72 | 18748919   | >Octadecanoic acid, trimethylsilyl ester                          | 1313   | Coraline Sediments  |                        |                                  |                  |
| 73 | 1825634    | >Silane, trimethylpropoxy-                                        | 1329   | Coraline Sediments  |                        |                                  |                  |
| 74 | EPA-363956 | diethylheptyloxytridecyloxy-                                      | 1480   | Coraline Sediments  |                        |                                  |                  |

|    | A          | B                                              | C      | D                   | E                      | F                                                              | G                                             |
|----|------------|------------------------------------------------|--------|---------------------|------------------------|----------------------------------------------------------------|-----------------------------------------------|
| 1  | CAS        | AMDIS Annotation                               | RT (s) | Environment         | Kovats retention index | Golm predicted functional groups                               | BinBase splashID                              |
| 75 | 39789134   | >5-Nonanol, trimethylsilyl ether               | 1486   | Coraline Sediments  |                        |                                                                |                                               |
| 76 | EPA-380091 | octakis(trimethylsilyl) ether                  | 1504   | Coraline Sediments* |                        |                                                                |                                               |
| 77 |            | octakis(trimethylsilyl) ether                  | 1553   | Coraline Sediments* |                        |                                                                |                                               |
| 78 | EPA-363093 | diethylnonyloxytridecyloxy-                    | 1568   | Coraline Sediments  |                        |                                                                |                                               |
| 79 | 481210     | >Cholestane                                    | 1618   | Coraline Sediments  |                        |                                                                |                                               |
| 80 | EPA-363960 | diethylheptyloxyoctadecyloxy-                  | 1833   | Coraline Sediments  |                        |                                                                |                                               |
| 81 |            | Unknown 893                                    | 895    | Coraline Sediments* | 1563                   | No hits                                                        | No hits                                       |
| 82 |            | Unknown 1031                                   | 1031   | Coraline Sediments* | 1759                   | Primary Alcohol; Secondary alcohol; alcohol; 1,2 diol; Hydroxy | splash10-Ofvj-0920000000-2b50a374508a5be92557 |
| 83 |            | Unknown 1073                                   | 1073   | Coraline Sediments* | 1823                   | Hydroxy; Alcohol; Carboylic acid                               | No hits                                       |
| 84 | 81834517   | >Cyclopentene, 3-methyl-1-(trimethylsilyloxy)- | 443    | Mangrove sediments  |                        |                                                                |                                               |
| 85 | 13368428   | (Trimethylsilyl)morpholine                     | 453    | Mangrove sediments  |                        |                                                                |                                               |
| 86 | 108758     | >Pyridine, 2,4,6-trimethyl-                    | 454    | Mangrove sediments  |                        |                                                                |                                               |

|    | A          | B                                                               | C      | D                   | E                      | F                                | G                |
|----|------------|-----------------------------------------------------------------|--------|---------------------|------------------------|----------------------------------|------------------|
| 1  | CAS        | AMDIS Annotation                                                | RT (s) | Environment         | Kovats retention index | Golm predicted functional groups | BinBase splashID |
| 87 | 360952     | Trifluoroacetylmorpholine                                       | 458    | Mangrove sediments  |                        |                                  |                  |
| 88 | 13871891   | >Silane, (cyclohexyloxy)trimethyl-                              | 460    | Mangrove sediments  |                        |                                  |                  |
| 89 | EPA-366582 | >Tris(trimethylsilyl)carbamate                                  | 469    | Mangrove sediments  |                        |                                  |                  |
| 90 | 7331842    | trimethyl-N-propyl-N-(trimethylsilyl)-                          | 470    | Mangrove sediments  |                        |                                  |                  |
| 91 | 141628     | >Tetrasiloxane, decamethyl-                                     | 474    | Mangrove sediments  |                        |                                  |                  |
| 92 | 67370836   | Diazacyclopentadecan-6-one, 1-acetyl-                           | 479    | Mangrove sediments  |                        |                                  |                  |
| 93 | 141628     | >Tetrasiloxane, decamethyl-                                     | 488    | Mangrove sediments  |                        |                                  |                  |
| 94 | 58792522   | >5-Propoxy-2,2'-bipyridyl                                       | 490    | Mangrove sediments  |                        |                                  |                  |
| 95 | EPA-322566 | Diethyl(trimethylsilyl)carbamate                                | 493    | Mangrove sediments  |                        |                                  |                  |
| 96 | 17596962   | >Propanoic acid, 2-[[trimethylsilyl]oxy]-, trimethylsilyl ester | 494    | Mangrove sediments* |                        |                                  |                  |
| 97 | EPA-378915 | methylenedioxyphenyl]-3-buten-2-one                             | 498    | Mangrove sediments  |                        |                                  |                  |
| 98 | 107517     | >Trisiloxane, octamethyl-                                       | 500    | Mangrove sediments  |                        |                                  |                  |
| 99 | 107460     | >Disiloxane, hexamethyl-                                        | 506    | Mangrove sediments  |                        |                                  |                  |



|     | A          | B                                                         | C      | D                   | E                      | F                                | G                |
|-----|------------|-----------------------------------------------------------|--------|---------------------|------------------------|----------------------------------|------------------|
| 1   | CAS        | AMDIS Annotation                                          | RT (s) | Environment         | Kovats retention index | Golm predicted functional groups | BinBase splashID |
| 100 | EPA-329289 | ethoxycarbonyl-, dodecyl ester                            | 513    | Mangrove sediments* |                        |                                  |                  |
| 101 | 107460     | >Disiloxane, hexamethyl-                                  | 550    | Mangrove sediments  |                        |                                  |                  |
| 102 | 39981890   | >Silanol, trimethyl-, carbonate (2:1)                     | 562    | Mangrove sediments  |                        |                                  |                  |
| 103 | 14642796   | trimethyl(phenylmethoxy)-                                 | 573    | Mangrove sediments  |                        |                                  |                  |
| 104 | 141639     | >Pentasiloxane, dodecamethyl-                             | 580    | Mangrove sediments  |                        |                                  |                  |
| 105 | EPA-214683 | >3,5-Dihydroxy-2H-1,2,4-oxadiazine                        | 591    | Mangrove sediments  |                        |                                  |                  |
| 106 | 141639     | >Pentasiloxane, dodecamethyl-                             | 612    | Mangrove sediments  |                        |                                  |                  |
| 107 | 18394042   | >n-Butylamine, N,N-bis(trimethylsilyl)                    | 620    | Mangrove sediments  |                        |                                  |                  |
| 108 | 141639     | >Pentasiloxane, dodecamethyl-                             | 627    | Mangrove sediments  |                        |                                  |                  |
| 109 | 75732411   | dimethylethyl)dimethyl-, benzoate                         | 649    | Mangrove sediments  |                        |                                  |                  |
| 110 | EPA-328643 | >l-Norvaline, N-(2-methoxyethoxycarbonyl)-, undecyl ester | 661    | Mangrove sediments  |                        |                                  |                  |
| 111 | 6787106    | >Glycerol, tris(trimethylsilyl) ether                     | 665    | Mangrove sediments* |                        |                                  |                  |
| 112 | 63830693   | >4-Nonene, 3-methyl-, (Z)-                                | 693    | Mangrove sediments  |                        |                                  |                  |

|     | A          | B                                                             | C      | D                   | E                      | F                                | G                |
|-----|------------|---------------------------------------------------------------|--------|---------------------|------------------------|----------------------------------|------------------|
| 1   | CAS        | AMDIS Annotation                                              | RT (s) | Environment         | Kovats retention index | Golm predicted functional groups | BinBase splashID |
| 113 | 63830693   | >4-Nonene, 3-methyl-, (Z)-                                    | 700    | Mangrove sediments  |                        |                                  |                  |
| 114 | 4282422    | >Nonane, 1-iodo-                                              | 709    | Mangrove sediments  |                        |                                  |                  |
| 115 | 562492     | >Pentane, 3,3-dimethyl-                                       | 815    | Mangrove sediments  |                        |                                  |                  |
| 116 | 19218941   | >Tetradecane, 1-iodo-                                         | 840    | Mangrove sediments  |                        |                                  |                  |
| 117 | 105577     | >Ethane, 1,1-diethoxy-                                        | 845    | Mangrove sediments  |                        |                                  |                  |
| 118 | 20633130   | >Nitric acid, nonyl ester                                     | 861    | Mangrove sediments  |                        |                                  |                  |
| 119 | 2216355    | >2-Bromononane                                                | 873    | Mangrove sediments  |                        |                                  |                  |
| 120 | 10416736   | >Trimethyl(2,6 ditert.-butylphenoxy)silane                    | 875    | Mangrove sediments  |                        |                                  |                  |
| 121 | EPA-309237 | >Oxalic acid, allyl nonyl ester                               | 881    | Mangrove sediments  |                        |                                  |                  |
| 122 | 7154805    | >Heptane, 3,3,5-trimethyl-                                    | 888    | Mangrove sediments  |                        |                                  |                  |
| 123 | 51764320   | >Azetidine, 1,2-dimethyl-                                     | 896    | Mangrove sediments  |                        |                                  |                  |
| 124 | 562492     | >Pentane, 3,3-dimethyl-                                       | 903    | Mangrove sediments  |                        |                                  |                  |
| 125 | 74381401   | methyl-, 1-(1,1-dimethylethyl)-2-methyl-1,3-propanediyl ester | 914    | Mangrove sediments* |                        |                                  |                  |

|     | A          | B                                                                                   | C      | D                   | E                      | F                                | G                |
|-----|------------|-------------------------------------------------------------------------------------|--------|---------------------|------------------------|----------------------------------|------------------|
| 1   | CAS        | AMDIS Annotation                                                                    | RT (s) | Environment         | Kovats retention index | Golm predicted functional groups | BinBase splashID |
| 126 |            | Lauric acid                                                                         | 937    | Mangrove sediments* |                        |                                  |                  |
| 127 | 834979     | >1-Acetyl-4,6,8-trimethylazulene                                                    | 980    | Mangrove sediments  |                        |                                  |                  |
| 128 | 4032864    | >Heptane, 3,3-dimethyl-                                                             | 990    | Mangrove sediments  |                        |                                  |                  |
| 129 | 625741     | >Propane, 2-methyl-1-nitro-                                                         | 992    | Mangrove sediments  |                        |                                  |                  |
| 130 | 35223      | pentakis(trimethylsilyl) ether                                                      | 1002   | Mangrove sediments  |                        |                                  |                  |
| 131 | EPA-368587 | (trimethylsilyloxy)-5-((trimethylsilyloxy)methyl)-3,6,10-trioxa-2,11-disiladodecane | 1015   | Mangrove sediments  |                        |                                  |                  |
| 132 | EPA-309243 | >Oxalic acid, allyl pentadecyl ester                                                | 1016   | Mangrove sediments  |                        |                                  |                  |
| 133 | EPA-309202 | >Sulfurous acid, 2-ethylhexyl hexyl ester                                           | 1019   | Mangrove sediments  |                        |                                  |                  |
| 134 | 63830693   | >4-Nonene, 3-methyl-, (Z)-                                                          | 1022   | Mangrove sediments  |                        |                                  |                  |
| 135 | EPA-368588 | oxybis(methylene)bis(2,2,7,7-tetramethyl-3,6-dioxa-2,7-disilaoctane)                | 1026   | Mangrove sediments  |                        |                                  |                  |
| 136 | EPA-368588 | oxybis(methylene)bis(2,2,7,7-tetramethyl-3,6-dioxa-2,7-disilaoctane)                | 1027   | Mangrove sediments  |                        |                                  |                  |

|     | A          | B                                                              | C      | D                   | E                      | F                                | G                |
|-----|------------|----------------------------------------------------------------|--------|---------------------|------------------------|----------------------------------|------------------|
| 1   | CAS        | AMDIS Annotation                                               | RT (s) | Environment         | Kovats retention index | Golm predicted functional groups | BinBase splashID |
| 137 | EPA-380115 | >D-(-)-Ribofuranose, tetrakis(trimethylsilyl) ether (isomer 1) | 1030   | Mangrove sediments  |                        |                                  |                  |
| 138 | 6790370    | >2-Methyl-3-vinyl-oxirane                                      | 1035   | Mangrove sediments  |                        |                                  |                  |
| 139 | 49852359   | >2-Hepten-4-one, 6-methyl-                                     | 1042   | Mangrove sediments  |                        |                                  |                  |
| 140 |            | Azelaic acid                                                   | 1048   | Mangrove sediments* |                        |                                  |                  |
| 141 | EPA-152343 | >Borane, diethyl(decyloxy)-                                    | 1060   | Mangrove sediments  |                        |                                  |                  |
| 142 | 18603173   | >Tetradecanoic acid, trimethylsilyl ester                      | 1084   | Mangrove sediments  |                        |                                  |                  |
| 143 | EPA-314901 | >Phthalic acid, cyclobutyl hexyl ester                         | 1095   | Mangrove sediments  |                        |                                  |                  |
| 144 | 5694688    | >1,3-Dioxolane-2-methanol                                      | 1109   | Mangrove sediments  |                        |                                  |                  |
| 145 | 563166     | >Hexane, 3,3-dimethyl-                                         | 1115   | Mangrove sediments  |                        |                                  |                  |
| 146 | EPA-283076 | >4-Dimethylisopropylsilyloxy hexadecane                        | 1122   | Mangrove sediments  |                        |                                  |                  |
| 147 | 82304663   | >7,9-Di-tert-butyl-1-oxaspiro(4,5)deca-6,9-diene-2,8-dione     | 1124   | Mangrove sediments  |                        |                                  |                  |
| 148 | 54410989   | >1-Nonene, 4,6,8-trimethyl-                                    | 1126   | Mangrove sediments* |                        |                                  |                  |

|     | A          | B                                             | C      | D                   | E                      | F                                | G                |
|-----|------------|-----------------------------------------------|--------|---------------------|------------------------|----------------------------------|------------------|
| 1   | CAS        | AMDIS Annotation                              | RT (s) | Environment         | Kovats retention index | Golm predicted functional groups | BinBase splashID |
| 149 |            | Mannitol                                      | 1138   | Mangrove sediments* |                        |                                  |                  |
| 150 | 74367229   | >n-Pentadecanoic acid, trimethylsilyl ester   | 1144   | Mangrove sediments  |                        |                                  |                  |
| 151 | 4160752    | >2-Propanone, 1-cyclopropyl-                  | 1149   | Mangrove sediments  |                        |                                  |                  |
| 152 | EPA-309202 | >Sulfurous acid, 2-ethylhexyl hexyl ester     | 1152   | Mangrove sediments  |                        |                                  |                  |
| 153 | 20633038   | >3,4-Hexanedione, 2,2,5-trimethyl-            | 1162   | Mangrove sediments  |                        |                                  |                  |
| 154 | 1189997    | >Heptane, 2,5,5-trimethyl-                    | 1167   | Mangrove sediments  |                        |                                  |                  |
| 155 | EPA-298836 | >4-Azaphenanthrene, 1-methyl-3-phenylethynyl- | 1176   | Mangrove sediments  |                        |                                  |                  |
| 156 |            | Palmitic acid                                 | 1177   | Mangrove sediments* |                        |                                  |                  |
| 157 | 13427435   | >1-Hexene, 3,3,5-trimethyl-                   | 1194   | Mangrove sediments  |                        |                                  |                  |
| 158 | 10444072   | methoxy-3-methylbenzofuran)                   | 1201   | Mangrove sediments  |                        |                                  |                  |
| 159 | 55520893   | >Hexadecanoic acid, trimethylsilyl ester      | 1203   | Mangrove sediments  |                        |                                  |                  |
| 160 |            | Isooctyl laurate                              | 1235   | Mangrove sediments* |                        |                                  |                  |
| 161 | 104255814  | tert-butyldimethylsilyl ester                 | 1242   | Mangrove sediments  |                        |                                  |                  |

|     | A          | B                                                                    | C      | D                   | E                      | F                                | G                |
|-----|------------|----------------------------------------------------------------------|--------|---------------------|------------------------|----------------------------------|------------------|
| 1   | CAS        | AMDIS Annotation                                                     | RT (s) | Environment         | Kovats retention index | Golm predicted functional groups | BinBase splashID |
| 162 | 55517583   | >Heptadecanoic acid, trimethylsilyl ester                            | 1258   | Mangrove sediments  |                        |                                  |                  |
| 163 | 122085614  | >Phosphine oxide, bis(pentamethylphenyl)-                            | 1264   | Mangrove sediments  |                        |                                  |                  |
| 164 | 1116650    | bis(trimethylsiloxy)propyl ester                                     | 1289   | Mangrove sediments* |                        |                                  |                  |
| 165 | EPA-363741 | diethylhexyloxytridecyloxy-                                          | 1299   | Mangrove sediments  |                        |                                  |                  |
| 166 | 18748919   | >Octadecanoic acid, trimethylsilyl ester                             | 1313   | Mangrove sediments  |                        |                                  |                  |
| 167 | EPA-367922 | >Formic acid, 2-ethylbutyl ester                                     | 1324   | Mangrove sediments  |                        |                                  |                  |
| 168 | 94883973   | >(1-Propoxy-pentyl)-cyclopropane                                     | 1332   | Mangrove sediments  |                        |                                  |                  |
| 169 | 87734665   | >7H-Benzo[c]furo[2,3-f][1]benzopyran, 2,7,7,10-tetramethyl-4-pentyl- | 1336   | Mangrove sediments  |                        |                                  |                  |
| 170 | EPA-363080 | >Silane, diethyldecyloxyoctyloxy-                                    | 1369   | Mangrove sediments  |                        |                                  |                  |
| 171 | 33648769   | >2-Deoxy ribose O,O',O''-tris(trimethylsilyl)-                       | 1371   | Mangrove sediments* |                        |                                  |                  |
| 172 | 563166     | >Hexane, 3,3-dimethyl-                                               | 1381   | Mangrove sediments  |                        |                                  |                  |
| 173 | 1188734    | bis(trimethylsiloxy)propyl ester                                     | 1387   | Mangrove sediments* |                        |                                  |                  |
| 174 | EPA-315373 | >Phthalic acid, di(3-methylphenyl) ester                             | 1391   | Mangrove sediments  |                        |                                  |                  |

|     | A          | B                                              | C      | D                   | E                      | F                                | G                |
|-----|------------|------------------------------------------------|--------|---------------------|------------------------|----------------------------------|------------------|
| 1   | CAS        | AMDIS Annotation                               | RT (s) | Environment         | Kovats retention index | Golm predicted functional groups | BinBase splashID |
| 175 | EPA-309237 | >Oxalic acid, allyl nonyl ester                | 1411   | Mangrove sediments  |                        |                                  |                  |
| 176 | EPA-363068 | diethylisobutoxypentacycloxy-                  | 1417   | Mangrove sediments  |                        |                                  |                  |
| 177 | EPA-112561 | methyl-2-tetrahydrofuryl)tetrahydr             | 1428   | Mangrove sediments  |                        |                                  |                  |
| 178 | EPA-153631 | glycerine-(1)-monoester, bis-O-trimethylsilyl- | 1434   | Mangrove sediments* |                        |                                  |                  |
| 179 | EPA-363956 | diethylheptyloxytridecylxy-                    | 1463   | Mangrove sediments  |                        |                                  |                  |
| 180 | 53212978   | Monopalmitoylglycerol trimethylsilyl ether     | 1464   | Mangrove sediments* |                        |                                  |                  |
| 181 | 1689834    | >Benzonitrile, 4-hydroxy-3,5-diiodo-           | 1481   | Mangrove sediments* |                        |                                  |                  |
| 182 | 1188745    | bis[(trimethylsilyl)oxy]propyl ester           | 1482   | Mangrove sediments  |                        |                                  |                  |
| 183 | 544763     | >Hexadecane                                    | 1490   | Mangrove sediments  |                        |                                  |                  |
| 184 |            | Sucrose                                        | 1503   | Mangrove sediments* |                        |                                  |                  |
| 185 | EPA-153632 | glycerine-(1)-monoester, bis-O-trimethylsilyl- | 1507   | Mangrove sediments* |                        |                                  |                  |
| 186 | EPA-153632 | glycerine-(1)-monoester, bis-O-trimethylsilyl- | 1512   | Mangrove sediments  |                        |                                  |                  |
| 187 | EPA-153632 | glycerine-(1)-monoester, bis-O-trimethylsilyl- | 1524   | Mangrove sediments* |                        |                                  |                  |

|     | A          | B                                              | C      | D                   | E                      | F                                | G                |
|-----|------------|------------------------------------------------|--------|---------------------|------------------------|----------------------------------|------------------|
| 1   | CAS        | AMDIS Annotation                               | RT (s) | Environment         | Kovats retention index | Golm predicted functional groups | BinBase splashID |
| 188 | EPA-309202 | >Sulfurous acid, 2-ethylhexyl hexyl ester      | 1535   | Mangrove sediments  |                        |                                  |                  |
| 189 | EPA-363325 | diethylisohexyloxyoctadecyloxy-                | 1537   | Mangrove sediments  |                        |                                  |                  |
| 190 | 53336133   | >2-Monostearin trimethylsilyl ether            | 1551   | Mangrove sediments* |                        |                                  |                  |
| 191 | EPA-363108 | diethylheptadecyloxy(2-methylbutoxy)-          | 1568   | Mangrove sediments  |                        |                                  |                  |
| 192 | 1188756    | bis[(trimethylsilyl)oxy]propyl ester           | 1570   | Mangrove sediments* |                        |                                  |                  |
| 193 | 1188756    | bis[(trimethylsilyl)oxy]propyl ester           | 1571   | Mangrove sediments  |                        |                                  |                  |
| 194 | 544763     | >Hexadecane                                    | 1580   | Mangrove sediments  |                        |                                  |                  |
| 195 | EPA-153824 | glycerine-(1)-monoester, bis-O-trimethylsilyl- | 1607   | Mangrove sediments* |                        |                                  |                  |
| 196 | 20690839   | 2',6'-dimethoxy-4,4'-methylenedi-              | 1617   | Mangrove sediments  |                        |                                  |                  |
| 197 | 481210     | >Cholestane                                    | 1617   | Mangrove sediments  |                        |                                  |                  |
| 198 | 1072168    | >Octane, 2,7-dimethyl-                         | 1620   | Mangrove sediments  |                        |                                  |                  |
| 199 | 55517947   | bis[(trimethylsilyl)oxy]propyl ester           | 1646   | Mangrove sediments* |                        |                                  |                  |
| 200 | 61227870   | >2,5-Octadiyne, 4,4-diethyl-                   | 1655   | Mangrove sediments  |                        |                                  |                  |



|     | A          | B                              | C      | D                   | E                      | F                                                              | G                                             |
|-----|------------|--------------------------------|--------|---------------------|------------------------|----------------------------------------------------------------|-----------------------------------------------|
| 1   | CAS        | AMDIS Annotation               | RT (s) | Environment         | Kovats retention index | Golm predicted functional groups                               | BinBase splashID                              |
| 201 | 463821     | >Neopentane                    | 1660   | Mangrove sediments  |                        |                                                                |                                               |
| 202 | EPA-363960 | diethylheptyloxyoctadecyloxy-  | 1685   | Mangrove sediments  |                        |                                                                |                                               |
| 203 | EPA-363331 | diethyldecyloxyhexadecyloxy-   | 1723   | Mangrove sediments  |                        |                                                                |                                               |
| 204 | EPA-365944 | >2-ethenyl-3-ethylpyrazine     | 1752   | Mangrove sediments  |                        |                                                                |                                               |
| 205 | EPA-363972 | diethylhexadecyloxyundecyloxy- | 1763   | Mangrove sediments  |                        |                                                                |                                               |
| 206 | EPA-363960 | diethylheptyloxyoctadecyloxy-  | 1830   | Mangrove sediments  |                        |                                                                |                                               |
| 207 |            | Unknown 1031                   | 1031   | Mangrove sediments* | 1759                   | Primary Alcohol; Secondary alcohol; alcohol; 1,2 diol; Hydroxy | splash10-0fvj-0920000000-2b50a374508a5be92557 |
| 208 |            | Unkonwn 1595                   | 1595   | Mangrove sediments* | 2832                   | Alcohol                                                        | No hits                                       |
| 209 |            | Unknown 1635                   | 1635   | Mangrove sediments* | 2930                   | Alcohol; Hydroxy; primary alcohol                              | no hits                                       |
| 210 |            | Unknown 1672                   | 1672   | Mangrove sediments* | 2023                   | Alcohol; Hydroxy; primary alcohol                              | No hits                                       |
| 211 |            | Unknown 1721                   | 1721   | Mangrove sediments* | 3151                   | Hydroxy alcohol; carboxylic acid; primary alcohol              | splash10-05o0-1910000000-49e59c211689b393e2a6 |

|     | A          | B                                                               | C      | D                   | E                      | F                                                 | G                |
|-----|------------|-----------------------------------------------------------------|--------|---------------------|------------------------|---------------------------------------------------|------------------|
| 1   | CAS        | AMDIS Annotation                                                | RT (s) | Environment         | Kovats retention index | Golm predicted functional groups                  | BinBase splashID |
| 212 |            | Unknown 1734                                                    | 1734   | Mangrove sediments* | 3185                   | Alcohol; Hydroxy primary alcohol                  | No hits          |
| 213 |            | Unkonwn 1746                                                    | 1746   | Mangrove sediments* | 3215                   | Alcohol; hydroxy; Primary alcohol                 | No hits          |
| 214 |            | Unknown 2005                                                    | 2005   | Mangrove sediments* | 3691                   | Alcohol; hydroxy; alkene                          | No hits          |
| 215 |            | Unknown 2035                                                    | 2035   | Mangrove sediments* | NA                     | Hydroxy alcohol; carboxylic acid; primary alcohol | No hits          |
| 216 | 502976     | >1,4-Dioxane-2,5-dione                                          | 442    | Cell culture        |                        |                                                   |                  |
| 217 | 13871891   | (cyclohexyloxy)trimethyl-                                       | 444    | Cell culture        |                        |                                                   |                  |
| 218 | 95681      | dimethyl-                                                       | 445    | Cell culture        |                        |                                                   |                  |
| 219 | 35227840   | Biphenylenephosphoric                                           | 450    | Cell culture        |                        |                                                   |                  |
| 220 | EPA-366582 | >Tris(trimethylsilyl)carbamate                                  | 452    | Cell culture        |                        |                                                   |                  |
| 221 | 7331842    | trimethyl-N-propyl-N-(trimethylsilyl)-                          | 453    | Cell culture        |                        |                                                   |                  |
| 222 | 107460     | >Disiloxane, hexamethyl-                                        | 457    | Cell culture        |                        |                                                   |                  |
| 223 | 141628     | decamethyl-                                                     | 459    | Cell culture        |                        |                                                   |                  |
| 224 | 53274854   | bis(trimethylsiloxy)-                                           | 465    | Cell culture        |                        |                                                   |                  |
| 225 | EPA-147861 | benzylidene-coumaran-3-one                                      | 466    | Cell culture        |                        |                                                   |                  |
| 226 | 141628     | decamethyl-                                                     | 474    | Cell culture        |                        |                                                   |                  |
| 227 | EPA-314859 | >Phthalimide, N-isopropyl-                                      | 478    | Cell culture        |                        |                                                   |                  |
| 228 | 17596962   | >Propanoic acid, 2-[(trimethylsilyl)oxy]-, trimethylsilyl ester | 480    | Cell culture        |                        |                                                   |                  |

|     | A          | B                                             | C      | D            | E                      | F                                | G                |
|-----|------------|-----------------------------------------------|--------|--------------|------------------------|----------------------------------|------------------|
| 1   | CAS        | AMDIS Annotation                              | RT (s) | Environment  | Kovats retention index | Golm predicted functional groups | BinBase splashID |
| 229 | 17301325   | >Undecane, 4,7-dimethyl-                      | 483    | Cell culture |                        |                                  |                  |
| 230 | 18294047   | >Ethanedioic acid, bis(trimethylsilyl) ester  | 484    | Cell culture |                        |                                  |                  |
| 231 | 107517     | >Trisiloxane, octamethyl-                     | 485    | Cell culture |                        |                                  |                  |
| 232 | 111433     | >Di-n-propyl ether                            | 489    | Cell culture |                        |                                  |                  |
| 233 | EPA-216941 | Pentamethyldisilanyloxy pentane               | 494    | Cell culture |                        |                                  |                  |
| 234 | 1630768    | propyl-                                       | 501    | Cell culture |                        |                                  |                  |
| 235 | 52060852   | >Propanoic acid, 2-oxo-, trimethylsilyl ester | 502    | Cell culture |                        |                                  |                  |
| 236 | 51099559   | 2H-pyrrole-2-carboxylic acid, ethyl ester     | 504    | Cell culture |                        |                                  |                  |
| 237 | 7480786    | ester                                         | 507    | Cell culture |                        |                                  |                  |
| 238 | EPA-328619 | propargyloxycarbonyl-, isohexyl ester         | 512    | Cell culture |                        |                                  |                  |
| 239 | 563166     | >Hexane, 3,3-dimethyl-                        | 515    | Cell culture |                        |                                  |                  |
| 240 | 27844071   | (trimethylsilyl)-, trimethylsilyl ester       | 517    | Cell culture |                        |                                  |                  |
| 241 | 18394042   | >n-Butylamine, N,N-bis(trimethylsilyl)        | 522    | Cell culture |                        |                                  |                  |
| 242 | 93677668   | oxybis-                                       | 524    | Cell culture |                        |                                  |                  |
| 243 | 1189997    | trimethyl-                                    | 525    | Cell culture |                        |                                  |                  |
| 244 | 3376327    | methyloxime                                   | 528    | Cell culture |                        |                                  |                  |
| 245 | 7364423    | (trimethylsilyl)-, trimethylsilyl ester       | 533    | Cell culture |                        |                                  |                  |
| 246 | 40333071   | methyl-, bis(trimethylsilyl) ester            | 540    | Cell culture |                        |                                  |                  |

|     | A          | B                                            | C      | D            | E                      | F                                | G                |
|-----|------------|----------------------------------------------|--------|--------------|------------------------|----------------------------------|------------------|
| 1   | CAS        | AMDIS Annotation                             | RT (s) | Environment  | Kovats retention index | Golm predicted functional groups | BinBase splashID |
| 247 | EPA-332781 | >3-Furoic acid, trimethylsilyl ester         | 547    | Cell culture |                        |                                  |                  |
| 248 | EPA-324066 | >Terephthalic acid, phenyl octyl ester       | 548    | Cell culture |                        |                                  |                  |
| 249 | EPA-353273 | 2-[(trimethylsilyl)oxy]prop-                 | 549    | Cell culture |                        |                                  |                  |
| 250 | 5501393    | acetyl-4-hydroxy-6-methyl-                   | 551    | Cell culture |                        |                                  |                  |
| 251 | 27531493   | 1,6-dihydro-1,5-dimethyl-6-phenyl-           | 552    | Cell culture |                        |                                  |                  |
| 252 | 18412685   | dimethylethyl)phenyl]trimethyl-              | 554    | Cell culture |                        |                                  |                  |
| 253 | 14468907   | pyrrolidinone                                | 555    | Cell culture |                        |                                  |                  |
| 254 | 14468907   | pyrrolidinone                                | 556    | Cell culture |                        |                                  |                  |
| 255 | EPA-333250 | >l-Leucine, trimethylsilyl ester             | 565    | Cell culture |                        |                                  |                  |
| 256 | 14642796   | trimethyl(phenylmethoxy                      | 565    | Cell culture |                        |                                  |                  |
| 257 | EPA-375246 | alcohol, 1-methylpropyl ether                | 568    | Cell culture |                        |                                  |                  |
| 258 | 141639     | dodecamethyl-                                | 570    | Cell culture |                        |                                  |                  |
| 259 | EPA-332992 | N-trimethylsilyl-, trimethylsilyl ester      | 576    | Cell culture |                        |                                  |                  |
| 260 | 541026     | decamethyl-                                  | 580    | Cell culture |                        |                                  |                  |
| 261 | 71330      | 2,4(1H,3H)-dione                             | 589    | Cell culture |                        |                                  |                  |
| 262 | 18294047   | >Ethanedioic acid, bis(trimethylsilyl) ester | 593    | Cell culture |                        |                                  |                  |

|     | A          | B                                                              | C      | D            | E                      | F                                | G                |
|-----|------------|----------------------------------------------------------------|--------|--------------|------------------------|----------------------------------|------------------|
| 1   | CAS        | AMDIS Annotation                                               | RT (s) | Environment  | Kovats retention index | Golm predicted functional groups | BinBase splashID |
| 263 | 96555429   | d]pyrimidin-4,6(5H,7H)-dione-3-carboxamide                     | 598    | Cell culture |                        |                                  |                  |
| 264 | 141639     | dodecamethyl-                                                  | 603    | Cell culture |                        |                                  |                  |
| 265 | 62016379   | >Octane, 2,4,6-trimethyl-                                      | 606    | Cell culture |                        |                                  |                  |
| 266 | EPA-192859 | methoxyphenyl)-N,N,N',N'-tetramethylethane-1,2-                | 613    | Cell culture |                        |                                  |                  |
| 267 | 7364445    | (trimethylsilyl)-, trimethylsilyl ester                        | 614    | Cell culture |                        |                                  |                  |
| 268 | 18394042   | >n-Butylamine, N,N-bis(trimethylsilyl)                         | 616    | Cell culture |                        |                                  |                  |
| 269 | 55133954   | >Butanoic acid, 4-[(trimethylsilyl)oxy]-, trimethylsilyl ester | 631    | Cell culture |                        |                                  |                  |
| 270 | 7335173    | octanone                                                       | 633    | Cell culture |                        |                                  |                  |
| 271 | 563166     | >Hexane, 3,3-dimethyl-                                         | 640    | Cell culture |                        |                                  |                  |
| 272 | 2078128    | trimethylsilyl ester                                           | 645    | Cell culture |                        |                                  |                  |
| 273 | 1014604    | >Benzene, 1,3-bis(1,1-dimethylethyl)-                          | 650    | Cell culture |                        |                                  |                  |
| 274 | 57162740   | azafluorene                                                    | 654    | Cell culture |                        |                                  |                  |
| 275 | 5269374    | ester                                                          | 657    | Cell culture |                        |                                  |                  |
| 276 | 17301325   | >Undecane, 4,7-dimethyl-                                       | 658    | Cell culture |                        |                                  |                  |
| 277 | 10497059   | phosphate (3:1)                                                | 660    | Cell culture |                        |                                  |                  |
| 278 | 70125610   | >6-Phenylisoquinoline                                          | 661    | Cell culture |                        |                                  |                  |
| 279 | 7364467    | (trimethylsilyl)-, trimethylsilyl ester                        | 662    | Cell culture |                        |                                  |                  |
| 280 | 56484516   | benzodioxole                                                   | 664    | Cell culture |                        |                                  |                  |

|     | A        | B                                                                | C      | D            | E                      | F                                | G                |
|-----|----------|------------------------------------------------------------------|--------|--------------|------------------------|----------------------------------|------------------|
| 1   | CAS      | AMDIS Annotation                                                 | RT (s) | Environment  | Kovats retention index | Golm predicted functional groups | BinBase splashID |
| 281 | 544763   | >Hexadecane                                                      | 669    | Cell culture |                        |                                  |                  |
| 282 | 33581769 | tris(trimethylsiloxy)-                                           | 674    | Cell culture |                        |                                  |                  |
| 283 | 17301303 | >Undecane, 3,8-dimethyl-                                         | 676    | Cell culture |                        |                                  |                  |
| 284 | 33581769 | tris(trimethylsiloxy)-                                           | 677    | Cell culture |                        |                                  |                  |
| 285 | 7483923  | (trimethylsilyl)-, trimethylsilyl ester                          | 679    | Cell culture |                        |                                  |                  |
| 286 | 55771409 | nonene                                                           | 682    | Cell culture |                        |                                  |                  |
| 287 | 7364478  | (trimethylsilyl)-, trimethylsilyl ester                          | 684    | Cell culture |                        |                                  |                  |
| 288 | 39538119 | >Butanoic acid, 4-[(trimethylsilyl)amino]-, trimethylsilyl ester | 687    | Cell culture |                        |                                  |                  |
| 289 | 90744459 | >Malonic acid, bis(2-trimethylsilylethyl ester                   | 689    | Cell culture |                        |                                  |                  |
| 290 | 5630820  | bis(trimethylsilyl)-, trimethylsilyl ester                       | 690    | Cell culture |                        |                                  |                  |
| 291 | 17312537 | >Decane, 3,6-dimethyl-                                           | 695    | Cell culture |                        |                                  |                  |
| 292 | 40309577 | >Butanedioic acid, bis(trimethylsilyl) ester                     | 697    | Cell culture |                        |                                  |                  |
| 293 | 38166006 | methyl-2,3-bis[(trimethylsilyl)oxy]-, trimethylsilyl ester       | 699    | Cell culture |                        |                                  |                  |
| 294 | 2216344  | >Octane, 4-methyl-                                               | 704    | Cell culture |                        |                                  |                  |
| 295 | 17312593 | >Undecane, 4-ethyl-                                              | 707    | Cell culture |                        |                                  |                  |
| 296 | 2003921  | Octamethyl-3,5-bis(trimethylsiloxy)tetras                        | 713    | Cell culture |                        |                                  |                  |

|     | A          | B                                                        | C      | D            | E                      | F                                | G                |
|-----|------------|----------------------------------------------------------|--------|--------------|------------------------|----------------------------------|------------------|
| 1   | CAS        | AMDIS Annotation                                         | RT (s) | Environment  | Kovats retention index | Golm predicted functional groups | BinBase splashID |
| 297 | 10457144   | >Pyrimidine, 2,4-bis[(trimethylsilyl)oxy]-               | 716    | Cell culture |                        |                                  |                  |
| 298 | EPA-352979 | trimethylsilyl-, trimethylsilyl ester                    | 717    | Cell culture |                        |                                  |                  |
| 299 | 107528     | tetradecamethyl-                                         | 728    | Cell culture |                        |                                  |                  |
| 300 | 64625178   | bis(trimethylsilyl)-, trimethylsilyl ester               | 733    | Cell culture |                        |                                  |                  |
| 301 | EPA-320706 | ethoxycarbonyl-, nonyl ester                             | 735    | Cell culture |                        |                                  |                  |
| 302 | 82326112   | trimethylsilyl ester                                     | 737    | Cell culture |                        |                                  |                  |
| 303 | 55255442   | acid, 1-(trimethylsilyl)-, trimethylsilyl ester          | 739    | Cell culture |                        |                                  |                  |
| 304 | 239441     | a]isoquinoline                                           | 742    | Cell culture |                        |                                  |                  |
| 305 | 107460     | >Disiloxane, hexamethyl-                                 | 743    | Cell culture |                        |                                  |                  |
| 306 | 261502936  | trimethylsilyloxyphenyl)propane                          | 747    | Cell culture |                        |                                  |                  |
| 307 | 32741245   | 5,8-dihydroxy-2,3,7-trimethyl-                           | 751    | Cell culture |                        |                                  |                  |
| 308 | 7537022    | Tris(trimethylsilyl)-L-threonine                         | 753    | Cell culture |                        |                                  |                  |
| 309 | 7537022    | Tris(trimethylsilyl)-L-threonine                         | 757    | Cell culture |                        |                                  |                  |
| 310 | EPA-105079 | >3-Methylbutyl N,O-bis(heptafluorobutyl)hydroxyprolinate | 761    | Cell culture |                        |                                  |                  |
| 311 | EPA-322566 | Diethyl(trimethylsilyl)carbamate                         | 769    | Cell culture |                        |                                  |                  |

|     | A          | B                                                                   | C      | D            | E                      | F                                | G                |
|-----|------------|---------------------------------------------------------------------|--------|--------------|------------------------|----------------------------------|------------------|
| 1   | CAS        | AMDIS Annotation                                                    | RT (s) | Environment  | Kovats retention index | Golm predicted functional groups | BinBase splashID |
| 312 | 55191521   | >Butanoic acid, 2,4-bis[(trimethylsilyl)oxy]-, trimethylsilyl ester | 774    | Cell culture |                        |                                  |                  |
| 313 | 32383769   | >Medicarpin                                                         | 776    | Cell culture |                        |                                  |                  |
| 314 | EPA-333294 | >l-Methionine, trimethylsilyl ester                                 | 778    | Cell culture |                        |                                  |                  |
| 315 | 15985054   | (trimethylsilyl)aspartic acid                                       | 779    | Cell culture |                        |                                  |                  |
| 316 | 563166     | >Hexane, 3,3-dimethyl-                                              | 780    | Cell culture |                        |                                  |                  |
| 317 | EPA-333288 | >l-Aspartic acid, bis(trimethylsilyl) ester                         | 786    | Cell culture |                        |                                  |                  |
| 318 | EPA-329585 | ethoxycarbonyl-, decyl ester                                        | 788    | Cell culture |                        |                                  |                  |
| 319 | 55191532   | >Butanoic acid, 3,4-bis[(trimethylsilyl)oxy]-, trimethylsilyl ester | 790    | Cell culture |                        |                                  |                  |
| 320 | 55320111   | (trimethylsilyl)-, trimethylsilyl ester                             | 795    | Cell culture |                        |                                  |                  |
| 321 | 53274854   | bis(trimethylsiloxy)-                                               | 797    | Cell culture |                        |                                  |                  |
| 322 | EPA-344664 | >Isophthalic acid, di(2-fluorophenyl) ester                         | 799    | Cell culture |                        |                                  |                  |
| 323 | 84498475   | >Benzoic alcohol, 2-hydroxy-3,5-dinitro-                            | 801    | Cell culture |                        |                                  |                  |
| 324 | 1.177E+09  | >L-Homoserine, N,O-bis(trimethylsilyl)-, trimethylsilyl ester       | 804    | Cell culture |                        |                                  |                  |



|     | A          | B                                                     | C      | D            | E                      | F                                | G                |
|-----|------------|-------------------------------------------------------|--------|--------------|------------------------|----------------------------------|------------------|
| 1   | CAS        | AMDIS Annotation                                      | RT (s) | Environment  | Kovats retention index | Golm predicted functional groups | BinBase splashID |
| 325 | 32565121   | (trimethylsilyl)-3-<br>[[trimethylsilyl]amino]-       | 811    | Cell culture |                        |                                  |                  |
| 326 | 104255745  | >Decanoic acid, tert-<br>butyldimethylsilyl ester     | 814    | Cell culture |                        |                                  |                  |
| 327 | 1009934    | Hexamethylcyclotrisilazane                            | 818    | Cell culture |                        |                                  |                  |
| 328 | 32741245   | 5,8-dihydroxy-2,3,7-<br>trimethyl-                    | 821    | Cell culture |                        |                                  |                  |
| 329 | EPA-79453  | monoamide, O,O'-<br>bis(trimethylsilyl)-              | 823    | Cell culture |                        |                                  |                  |
| 330 | 1560970    | >Dodecane, 2-methyl-                                  | 836    | Cell culture |                        |                                  |                  |
| 331 | 1560969    | >Tridecane, 2-methyl-                                 | 840    | Cell culture |                        |                                  |                  |
| 332 | EPA-353273 | 2-<br>[[trimethylsilyl]oxy]prop-                      | 841    | Cell culture |                        |                                  |                  |
| 333 | EPA-325648 | >Carbonic acid, butyl 2-<br>fluorophenyl ester        | 843    | Cell culture |                        |                                  |                  |
| 334 | EPA-330916 | >Pivalic acid, 3-<br>fluorophenyl ester               | 845    | Cell culture |                        |                                  |                  |
| 335 | 74810472   | Pyrimidinedione, dihydro-<br>1,3-bis(trimethylsilyl)- | 847    | Cell culture |                        |                                  |                  |
| 336 | 55268536   | (trimethylsilyl)-,<br>bis(trimethylsilyl) ester       | 858    | Cell culture |                        |                                  |                  |
| 337 | 27844106   | (trimethylsilyl)-,<br>trimethylsilyl ester            | 859    | Cell culture |                        |                                  |                  |
| 338 | 30274772   | (trimethylsilyl)-,<br>trimethylsilyl ester            | 862    | Cell culture |                        |                                  |                  |

|     | A          | B                                                                                               | C      | D            | E                      | F                                | G                |
|-----|------------|-------------------------------------------------------------------------------------------------|--------|--------------|------------------------|----------------------------------|------------------|
| 1   | CAS        | AMDIS Annotation                                                                                | RT (s) | Environment  | Kovats retention index | Golm predicted functional groups | BinBase splashID |
| 339 | 5630819    | trimethyl-N-(trimethylsilyl)-N-[2-[(trimethylsilyl)oxy]ethyl                                    | 867    | Cell culture |                        |                                  |                  |
| 340 | 73105676   | methylundecane                                                                                  | 875    | Cell culture |                        |                                  |                  |
| 341 | 10416736   | >Trimethyl(2,6 ditert.-butylphenoxy)silane                                                      | 876    | Cell culture |                        |                                  |                  |
| 342 | 2899425    | >Alanine, phenyl-, trimethylsilyl ester, dl-                                                    | 883    | Cell culture |                        |                                  |                  |
| 343 | 55517481   | >2-Piperidinecarboxylic acid, 1-(trimethylsilyl)-5-[[trimethylsilyl)oxy]-, trimethylsilyl ester | 891    | Cell culture |                        |                                  |                  |
| 344 | 27750523   | >Acetic acid, [o-(trimethylsiloxy)phenyl]-, trimethylsilyl ester                                | 894    | Cell culture |                        |                                  |                  |
| 345 | 60022879   | >Pentanedioic acid, 2-(methoxyimino)-, bis(trimethylsilyl) ester                                | 899    | Cell culture |                        |                                  |                  |
| 346 | 3042215    | phenyl-                                                                                         | 919    | Cell culture |                        |                                  |                  |
| 347 | 544763     | >Hexadecane                                                                                     | 922    | Cell culture |                        |                                  |                  |
| 348 | 24595708   | >Ornithine, tri-TMS                                                                             | 928    | Cell culture |                        |                                  |                  |
| 349 | 15985076   | (trimethylsilyl)-, bis(trimethylsilyl) ester,                                                   | 931    | Cell culture |                        |                                  |                  |
| 350 | EPA-215422 | dimethylethyl)-4-diphenylmethylenecyclohexa-2,5-dien-1-one                                      | 932    | Cell culture |                        |                                  |                  |

|     | A          | B                                                                              | C      | D            | E                      | F                                | G                |
|-----|------------|--------------------------------------------------------------------------------|--------|--------------|------------------------|----------------------------------|------------------|
| 1   | CAS        | AMDIS Annotation                                                               | RT (s) | Environment  | Kovats retention index | Golm predicted functional groups | BinBase splashID |
| 351 | 2899527    | (trimethylsilyl)phenylalanine                                                  | 937    | Cell culture |                        |                                  |                  |
| 352 | 2899527    | (trimethylsilyl)phenylalanine                                                  | 938    | Cell culture |                        |                                  |                  |
| 353 | EPA-214460 | >9-[4-[1,3-Diphenyl-2-imidazolidinyl]-2,3-O-[1-methylethylidene]--d-           | 939    | Cell culture |                        |                                  |                  |
| 354 | EPA-351997 | Pentafluoropropanoyloxyethoxyethoxyethoxyethyl 2,2,3,3,3-pentafluoropropanoate | 940    | Cell culture |                        |                                  |                  |
| 355 | 17962037   | >2-Butenedioic acid (E)-, bis(trimethylsilyl) ester                            | 960    | Cell culture |                        |                                  |                  |
| 356 | 55649622   | >L-Asparagine, N,N2-bis(trimethylsilyl)-, trimethylsilyl ester                 | 965    | Cell culture |                        |                                  |                  |
| 357 | 56196146   | pentakis-O-(trimethylsilyl)-, O-                                               | 967    | Cell culture |                        |                                  |                  |
| 358 | 107770990  | >3,5-Dimethyldodecane                                                          | 972    | Cell culture |                        |                                  |                  |
| 359 | 3892000    | trimethyl-                                                                     | 972    | Cell culture |                        |                                  |                  |
| 360 | EPA-324069 | >Terephthalic acid, phenyl undecyl ester                                       | 973    | Cell culture |                        |                                  |                  |
| 361 | EPA-352398 | Tris(hydroxymethyl)propane, tris(trimethylsilyl)                               | 976    | Cell culture |                        |                                  |                  |
| 362 | 76358800   | >Silane, (1,1-dimethylethyl)(hexadecyloxy)dimethyl-                            | 977    | Cell culture |                        |                                  |                  |

|     | A          | B                                                    | C      | D            | E                      | F                                | G                |
|-----|------------|------------------------------------------------------|--------|--------------|------------------------|----------------------------------|------------------|
| 1   | CAS        | AMDIS Annotation                                     | RT (s) | Environment  | Kovats retention index | Golm predicted functional groups | BinBase splashID |
| 363 | 68595506   | chloro-2-methoxybenzoyl)-4-                          | 984    | Cell culture |                        |                                  |                  |
| 364 | EPA-333699 | trimethylsilyl-, trimethylsilyl ester                | 985    | Cell culture |                        |                                  |                  |
| 365 | 24595695   | bis(trimethylsilyl)-, trimethylsilyl ester           | 991    | Cell culture |                        |                                  |                  |
| 366 | 20967435   | trifluoro-1-trifluoromethylethyl)-4,5-dihydrooxazole | 995    | Cell culture |                        |                                  |                  |
| 367 | 35223      | pentakis(trimethylsilyl) ether                       | 1000   | Cell culture |                        |                                  |                  |
| 368 | 17556104   | homoandrostan-17-one, (5 $\ddagger$ )-               | 1011   | Cell culture |                        |                                  |                  |
| 369 | EPA-333689 | trimethylsilyl-, trimethylsilyl ester                | 1018   | Cell culture |                        |                                  |                  |
| 370 | 124185     | >Decane                                              | 1023   | Cell culture |                        |                                  |                  |
| 371 | EPA-347187 | phenylprop-2-yl)phenoxy)propoxy-                     | 1028   | Cell culture |                        |                                  |                  |
| 372 | EPA-333692 | trimethylsilyl-, trimethylsilyl ester                | 1052   | Cell culture |                        |                                  |                  |
| 373 | 68595846   | triTMS                                               | 1053   | Cell culture |                        |                                  |                  |
| 374 | EPA-333692 | trimethylsilyl-, trimethylsilyl ester                | 1056   | Cell culture |                        |                                  |                  |
| 375 | EPA-333703 | trimethylsilyl-, trimethylsilyl ester                | 1058   | Cell culture |                        |                                  |                  |

|     | A          | B                                                                 | C      | D            | E                      | F                                | G                |
|-----|------------|-------------------------------------------------------------------|--------|--------------|------------------------|----------------------------------|------------------|
| 1   | CAS        | AMDIS Annotation                                                  | RT (s) | Environment  | Kovats retention index | Golm predicted functional groups | BinBase splashID |
| 376 | EPA-333139 | >DL-Ornithine, N,N,N'-tris(trimethylsilyl)-, trimethylsilyl ester | 1062   | Cell culture |                        |                                  |                  |
| 377 | EPA-333139 | >DL-Ornithine, N,N,N'-tris(trimethylsilyl)-, trimethylsilyl ester | 1062   | Cell culture |                        |                                  |                  |
| 378 | EPA-318480 | acid, fluoren-9-ylidene-hydrazide                                 | 1064   | Cell culture |                        |                                  |                  |
| 379 | 556901     | imino-                                                            | 1070   | Cell culture |                        |                                  |                  |
| 380 | 18406058   | >Benzoic acid, 4-[(trimethylsilyl)amino]-, trimethylsilyl ester   | 1075   | Cell culture |                        |                                  |                  |
| 381 | EPA-333696 | trimethylsilyl-, trimethylsilyl ester                             | 1082   | Cell culture |                        |                                  |                  |
| 382 | 56196146   | pentakis-O-(trimethylsilyl)-, O-                                  | 1094   | Cell culture |                        |                                  |                  |
| 383 | 17995049   | >9H-Purin-6-amine, N,9-bis(trimethylsilyl)-                       | 1097   | Cell culture |                        |                                  |                  |
| 384 | EPA-328940 | methoxycarbonyl-, dodecyl ester                                   | 1098   | Cell culture |                        |                                  |                  |
| 385 | EPA-333692 | trimethylsilyl-, trimethylsilyl ester                             | 1100   | Cell culture |                        |                                  |                  |
| 386 | 130405106  | pentakis-O-(trimethylsilyl)-, o-methyloxyme, (1E)-                | 1103   | Cell culture |                        |                                  |                  |

|     | A          | B                                                               | C      | D            | E                      | F                                | G                |
|-----|------------|-----------------------------------------------------------------|--------|--------------|------------------------|----------------------------------|------------------|
| 1   | CAS        | AMDIS Annotation                                                | RT (s) | Environment  | Kovats retention index | Golm predicted functional groups | BinBase splashID |
| 387 | 130405106  | pentakis-O-(trimethylsilyl)-, o-methyloxyme, (1E)-              | 1109   | Cell culture |                        |                                  |                  |
| 388 | 1009934    | Hexamethylcyclotrisilazane                                      | 1110   | Cell culture |                        |                                  |                  |
| 389 | EPA-347219 | >Silane, dimethyl(2-naphthoxy)dodecyloxy-                       | 1123   | Cell culture |                        |                                  |                  |
| 390 | 4346138    | tetradecanoate                                                  | 1125   | Cell culture |                        |                                  |                  |
| 391 | 1009934    | Hexamethylcyclotrisilazane                                      | 1127   | Cell culture |                        |                                  |                  |
| 392 | 55429077   | >L-Lysine, N2,N6,N6-tris(trimethylsilyl)-, trimethylsilyl ester | 1128   | Cell culture |                        |                                  |                  |
| 393 | 23743262   | ethanediylbis[dicyclohexyl-                                     | 1129   | Cell culture |                        |                                  |                  |
| 394 | 1009934    | Hexamethylcyclotrisilazane                                      | 1130   | Cell culture |                        |                                  |                  |
| 395 | EPA-333696 | trimethylsilyl-, trimethylsilyl ester                           | 1133   | Cell culture |                        |                                  |                  |
| 396 | 14199805   | glucitol                                                        | 1134   | Cell culture |                        |                                  |                  |
| 397 | 51220736   | bis(trimethylsilyl)-, trimethylsilyl ester                      | 1139   | Cell culture |                        |                                  |                  |
| 398 | 55255442   | acid, 1-(trimethylsilyl)-, trimethylsilyl ester                 | 1147   | Cell culture |                        |                                  |                  |
| 399 | 55320111   | (trimethylsilyl)-, trimethylsilyl ester                         | 1151   | Cell culture |                        |                                  |                  |

|     | A          | B                                               | C      | D            | E                      | F                                | G                |
|-----|------------|-------------------------------------------------|--------|--------------|------------------------|----------------------------------|------------------|
| 1   | CAS        | AMDIS Annotation                                | RT (s) | Environment  | Kovats retention index | Golm predicted functional groups | BinBase splashID |
| 400 | 7364478    | (trimethylsilyl)-, trimethylsilyl ester         | 1157   | Cell culture |                        |                                  |                  |
| 401 | 55255442   | acid, 1-(trimethylsilyl)-, trimethylsilyl ester | 1160   | Cell culture |                        |                                  |                  |
| 402 | EPA-333692 | trimethylsilyl-, trimethylsilyl ester           | 1163   | Cell culture |                        |                                  |                  |
| 403 | 55320111   | (trimethylsilyl)-, trimethylsilyl ester         | 1168   | Cell culture |                        |                                  |                  |
| 404 | EPA-192601 | 3,4-dicarboxylic acid, dimethyl ester           | 1173   | Cell culture |                        |                                  |                  |
| 405 | EPA-283115 | >1-(1-Adamantyl)-2-tripropylsilyloxyethane      | 1177   | Cell culture |                        |                                  |                  |
| 406 | 74036956   | >2-Bromotetradecane                             | 1179   | Cell culture |                        |                                  |                  |
| 407 | 19127152   | 2,3,4,5-tetrakis-O-(trimethylsilyl)-, L-        | 1181   | Cell culture |                        |                                  |                  |
| 408 | 18551036   | (trimethylsilyl)-2,6-bis[(trimethylsilyl)oxy]-  | 1184   | Cell culture |                        |                                  |                  |
| 409 | EPA-333692 | trimethylsilyl-, trimethylsilyl ester           | 1189   | Cell culture |                        |                                  |                  |
| 410 | 10444072   | methoxy-3-methylbenzofuran)                     | 1202   | Cell culture |                        |                                  |                  |
| 411 | 55520893   | >Hexadecanoic acid, trimethylsilyl ester        | 1203   | Cell culture |                        |                                  |                  |
| 412 | 4455269    | methyl-N-octyl-                                 | 1204   | Cell culture |                        |                                  |                  |
| 413 | 502976     | >1,4-Dioxane-2,5-dione                          | 1209   | Cell culture |                        |                                  |                  |
| 414 | EPA-320739 | propoxycarbonyl-, tetradecyl ester              | 1214   | Cell culture |                        |                                  |                  |

|     | A          | B                                               | C      | D            | E                      | F                                | G                |
|-----|------------|-------------------------------------------------|--------|--------------|------------------------|----------------------------------|------------------|
| 1   | CAS        | AMDIS Annotation                                | RT (s) | Environment  | Kovats retention index | Golm predicted functional groups | BinBase splashID |
| 415 | 2582798    | 1,2,3,4,5,6-hexakis-O-(trimethylsilyl)-         | 1224   | Cell culture |                        |                                  |                  |
| 416 | 55255442   | acid, 1-(trimethylsilyl)-, trimethylsilyl ester | 1225   | Cell culture |                        |                                  |                  |
| 417 | 593453     | >Octadecane                                     | 1230   | Cell culture |                        |                                  |                  |
| 418 | EPA-328944 | methoxycarbonyl-, heptadecyl ester              | 1238   | Cell culture |                        |                                  |                  |
| 419 | 55255442   | acid, 1-(trimethylsilyl)-, trimethylsilyl ester | 1241   | Cell culture |                        |                                  |                  |
| 420 | 502976     | >1,4-Dioxane-2,5-dione                          | 1245   | Cell culture |                        |                                  |                  |
| 421 | 593497     | >Heptacosane                                    | 1248   | Cell culture |                        |                                  |                  |
| 422 | 55320111   | (trimethylsilyl)-, trimethylsilyl ester         | 1254   | Cell culture |                        |                                  |                  |
| 423 | 17962899   | (trimethylsilyl)-6-[(trimethylsilyl)oxy]-       | 1256   | Cell culture |                        |                                  |                  |
| 424 | EPA-328838 | ethoxycarbonyl-, isoheptyl ester                | 1262   | Cell culture |                        |                                  |                  |
| 425 | 55255442   | acid, 1-(trimethylsilyl)-, trimethylsilyl ester | 1266   | Cell culture |                        |                                  |                  |
| 426 | 55255442   | acid, 1-(trimethylsilyl)-, trimethylsilyl ester | 1267   | Cell culture |                        |                                  |                  |
| 427 | 638368     | tetramethyl-                                    | 1271   | Cell culture |                        |                                  |                  |
| 428 | 147398445  | >Undecan, 1,11-bis(9,10-dihydroanthracen-9-yl)- | 1272   | Cell culture |                        |                                  |                  |
| 429 | EPA-333268 | trimethylsilyl-, trimethylsilyl ester           | 1285   | Cell culture |                        |                                  |                  |



|     | A          | B                                                             | C      | D            | E                      | F                                | G                |
|-----|------------|---------------------------------------------------------------|--------|--------------|------------------------|----------------------------------|------------------|
| 1   | CAS        | AMDIS Annotation                                              | RT (s) | Environment  | Kovats retention index | Golm predicted functional groups | BinBase splashID |
| 430 | 55320111   | (trimethylsilyl)-, trimethylsilyl ester                       | 1287   | Cell culture |                        |                                  |                  |
| 431 | 7364467    | (trimethylsilyl)-, trimethylsilyl ester                       | 1287   | Cell culture |                        |                                  |                  |
| 432 | EPA-307912 | dimethylisopropylsilyloxy benzene                             | 1293   | Cell culture |                        |                                  |                  |
| 433 | 55429282   | >L-Tryptophan, N,1-bis(trimethylsilyl)-, trimethylsilyl ester | 1295   | Cell culture |                        |                                  |                  |
| 434 | EPA-379991 | >Amphetamine TBDMS Derivative                                 | 1298   | Cell culture |                        |                                  |                  |
| 435 | EPA-328838 | ethoxycarbonyl-, isohexyl ester                               | 1306   | Cell culture |                        |                                  |                  |
| 436 | 18748919   | >Octadecanoic acid, trimethylsilyl ester                      | 1311   | Cell culture |                        |                                  |                  |
| 437 | EPA-328974 | Aminocyclopentanecarboxylic acid, N-                          | 1315   | Cell culture |                        |                                  |                  |
| 438 | 33342675   | >Thiazole, 2-(phenylthio)-                                    | 1316   | Cell culture |                        |                                  |                  |
| 439 | 55320111   | (trimethylsilyl)-, trimethylsilyl ester                       | 1317   | Cell culture |                        |                                  |                  |
| 440 | 646060     | >1,3-Dioxolane                                                | 1318   | Cell culture |                        |                                  |                  |
| 441 | EPA-329585 | ethoxycarbonyl-, decyl ester                                  | 1325   | Cell culture |                        |                                  |                  |
| 442 | EPA-163596 | dimethyl-N-(2'-t-butylcarbonylphenyl)-                        | 1337   | Cell culture |                        |                                  |                  |
| 443 | 19127152   | 2,3,4,5-tetrakis-O-(trimethylsilyl)-, L-                      | 1339   | Cell culture |                        |                                  |                  |

|     | A          | B                                                        | C      | D            | E                      | F                                | G                |
|-----|------------|----------------------------------------------------------|--------|--------------|------------------------|----------------------------------|------------------|
| 1   | CAS        | AMDIS Annotation                                         | RT (s) | Environment  | Kovats retention index | Golm predicted functional groups | BinBase splashID |
| 444 | EPA-320830 | propoxycarbonyl-, pentadecyl ester                       | 1348   | Cell culture |                        |                                  |                  |
| 445 | EPA-347187 | phenylprop-2-yl)phenoxy)propoxy-                         | 1354   | Cell culture |                        |                                  |                  |
| 446 | 21170627   | diacetyl-1,4-dihydro-4-isopropyl-                        | 1356   | Cell culture |                        |                                  |                  |
| 447 | 593497     | >Heptacosane                                             | 1359   | Cell culture |                        |                                  |                  |
| 448 | 7364478    | (trimethylsilyl)-, trimethylsilyl ester                  | 1361   | Cell culture |                        |                                  |                  |
| 449 | 55320111   | (trimethylsilyl)-, trimethylsilyl ester                  | 1361   | Cell culture |                        |                                  |                  |
| 450 | 55320111   | (trimethylsilyl)-, trimethylsilyl ester                  | 1367   | Cell culture |                        |                                  |                  |
| 451 | 55320111   | (trimethylsilyl)-, trimethylsilyl ester                  | 1368   | Cell culture |                        |                                  |                  |
| 452 | 593497     | >Heptacosane                                             | 1379   | Cell culture |                        |                                  |                  |
| 453 | 20836413   | trimethyl-N,N-bis[2-[(trimethylsilyl)oxy]ethyl           | 1381   | Cell culture |                        |                                  |                  |
| 454 | 55255442   | acid, 1-(trimethylsilyl)-, trimethylsilyl ester          | 1384   | Cell culture |                        |                                  |                  |
| 455 | 103231     | >Hexanedioic acid, bis(2-ethylhexyl) ester               | 1387   | Cell culture |                        |                                  |                  |
| 456 | EPA-315373 | >Phthalic acid, di(3-methylphenyl) ester                 | 1390   | Cell culture |                        |                                  |                  |
| 457 | 55606741   | bis[(trimethylsilyl)oxy]phenyl]ethyl]-1,1,1-trimethyl-N- | 1391   | Cell culture |                        |                                  |                  |

|     | A          | B                                                                         | C      | D            | E                      | F                                | G                |
|-----|------------|---------------------------------------------------------------------------|--------|--------------|------------------------|----------------------------------|------------------|
| 1   | CAS        | AMDIS Annotation                                                          | RT (s) | Environment  | Kovats retention index | Golm predicted functional groups | BinBase splashID |
| 458 | EPA-192601 | 3,4-dicarboxylic acid, dimethyl ester                                     | 1400   | Cell culture |                        |                                  |                  |
| 459 | EPA-329436 | propoxycarbonyl-, nonyl ester                                             | 1407   | Cell culture |                        |                                  |                  |
| 460 | EPA-367444 | >Uridine, tetra(trimethylsilyl)-                                          | 1410   | Cell culture |                        |                                  |                  |
| 461 | EPA-333703 | trimethylsilyl-, trimethylsilyl ester                                     | 1416   | Cell culture |                        |                                  |                  |
| 462 | 55606741   | bis[(trimethylsilyl)oxy]phenyl]ethyl]-1,1,1-trimethyl-N-                  | 1416   | Cell culture |                        |                                  |                  |
| 463 | EPA-328904 | Aminocyclopentanecarboxylic acid, N-methoxycarbonyl-, octyl               | 1419   | Cell culture |                        |                                  |                  |
| 464 | EPA-261109 | Azatricyclo[5.2.1.0(2,6)]decane-3,5-dione, 4-[4-(2-methylphenoxy)phenyl]- | 1420   | Cell culture |                        |                                  |                  |
| 465 | 14490052   | >7-Methyltryptamine                                                       | 1426   | Cell culture |                        |                                  |                  |
| 466 | 35479448   | disilaoctane, 2,2,7,7-tetramethyl-4,5-diphenyl-                           | 1429   | Cell culture |                        |                                  |                  |
| 467 | 7364445    | (trimethylsilyl)-, trimethylsilyl ester                                   | 1442   | Cell culture |                        |                                  |                  |
| 468 | 68122      | dimethyl-                                                                 | 1443   | Cell culture |                        |                                  |                  |
| 469 | EPA-364699 | >Ala-Gly, di (tert-butyl)dimethylsilyl) deriv.                            | 1443   | Cell culture |                        |                                  |                  |
| 470 | EPA-192601 | 3,4-dicarboxylic acid, dimethyl ester                                     | 1451   | Cell culture |                        |                                  |                  |

|     | A          | B                                                       | C      | D            | E                      | F                                | G                |
|-----|------------|---------------------------------------------------------|--------|--------------|------------------------|----------------------------------|------------------|
| 1   | CAS        | AMDIS Annotation                                        | RT (s) | Environment  | Kovats retention index | Golm predicted functional groups | BinBase splashID |
| 471 | 55606741   | bis[(trimethylsilyl)oxy]phenylethyl]-1,1,1-trimethyl-N- | 1454   | Cell culture |                        |                                  |                  |
| 472 | EPA-310350 | >Ethylamine, N,N-didecyl-2-(2-thiophenyl)-              | 1458   | Cell culture |                        |                                  |                  |
| 473 | 55320111   | (trimethylsilyl)-, trimethylsilyl ester                 | 1459   | Cell culture |                        |                                  |                  |
| 474 | 68595846   | triTMS                                                  | 1461   | Cell culture |                        |                                  |                  |
| 475 | 55606741   | bis[(trimethylsilyl)oxy]phenylethyl]-1,1,1-trimethyl-N- | 1467   | Cell culture |                        |                                  |                  |
| 476 | EPA-332747 | tetrakis(trimethylsilyl) ether                          | 1469   | Cell culture |                        |                                  |                  |
| 477 | EPA-363542 | diethyldodecyloxy(2-methoxyethoxy)-                     | 1477   | Cell culture |                        |                                  |                  |
| 478 | EPA-380438 | octakis(trimethylsilyl) ether                           | 1485   | Cell culture |                        |                                  |                  |
| 479 | 1560970    | >Dodecane, 2-methyl-                                    | 1487   | Cell culture |                        |                                  |                  |
| 480 | EPA-328548 | (2-methoxyethoxycarbonyl)-, tetradecyl ester            | 1492   | Cell culture |                        |                                  |                  |
| 481 | EPA-380091 | octakis(trimethylsilyl) ether                           | 1496   | Cell culture |                        |                                  |                  |
| 482 | 53294330   | tetrakis(trimethylsilyl)-                               | 1499   | Cell culture |                        |                                  |                  |

|     | A          | B                                                                            | C      | D            | E                      | F                                | G                |
|-----|------------|------------------------------------------------------------------------------|--------|--------------|------------------------|----------------------------------|------------------|
| 1   | CAS        | AMDIS Annotation                                                             | RT (s) | Environment  | Kovats retention index | Golm predicted functional groups | BinBase splashID |
| 483 | 55529685   | [2,3,4,6-tetrakis-O-(trimethylsilyl)-D-galactopyranosyl]-1,2,3,6-tetrakis-O- | 1504   | Cell culture |                        |                                  |                  |
| 484 | 332148911  | fluorophenylethynyl)-2,3,5,6-                                                | 1509   | Cell culture |                        |                                  |                  |
| 485 | 55429282   | >L-Tryptophan, N,1-bis(trimethylsilyl)-, trimethylsilyl ester                | 1513   | Cell culture |                        |                                  |                  |
| 486 | EPA-380102 | octakis(trimethylsilyl) ether, methyloxime                                   | 1520   | Cell culture |                        |                                  |                  |
| 487 | 55255442   | acid, 1-(trimethylsilyl)-, trimethylsilyl ester                              | 1524   | Cell culture |                        |                                  |                  |
| 488 | EPA-322000 | allyloxycarbonyl-, hexadecyl ester                                           | 1531   | Cell culture |                        |                                  |                  |
| 489 | EPA-380438 | octakis(trimethylsilyl) ether                                                | 1541   | Cell culture |                        |                                  |                  |
| 490 | EPA-380438 | octakis(trimethylsilyl) ether                                                | 1544   | Cell culture |                        |                                  |                  |
| 491 | EPA-352398 | Tris(hydroxymethyl)propane, tris(trimethylsilyl)                             | 1547   | Cell culture |                        |                                  |                  |
| 492 | 188943     | >Diindeno[1,2,3-cd:1',2',3'-lm]perylene                                      | 1554   | Cell culture |                        |                                  |                  |
| 493 | EPA-367439 | >Guanosine, penta(trimethylsilyl)-                                           | 1557   | Cell culture |                        |                                  |                  |
| 494 | EPA-363093 | diethylnonyloxytridecyloxy-                                                  | 1563   | Cell culture |                        |                                  |                  |

|     | A          | B                                                                            | C      | D            | E                      | F                                | G                |
|-----|------------|------------------------------------------------------------------------------|--------|--------------|------------------------|----------------------------------|------------------|
| 1   | CAS        | AMDIS Annotation                                                             | RT (s) | Environment  | Kovats retention index | Golm predicted functional groups | BinBase splashID |
| 495 | 55529685   | [2,3,4,6-tetrakis-O-(trimethylsilyl)-D-galactopyranosyl]-1,2,3,6-tetrakis-O- | 1571   | Cell culture |                        |                                  |                  |
| 496 | 646311     | >Tetracosane                                                                 | 1576   | Cell culture |                        |                                  |                  |
| 497 | EPA-380438 | octakis(trimethylsilyl) ether                                                | 1577   | Cell culture |                        |                                  |                  |
| 498 | 31123792   | >1-Propanol, 2-methyl-3-(tributylstannyl)-                                   | 1580   | Cell culture |                        |                                  |                  |
| 499 | EPA-331943 | 1,2,4-triazine-3,5(2H,4H)-dione tetratms                                     | 1587   | Cell culture |                        |                                  |                  |
| 500 | 75763      | >Silane, tetramethyl-                                                        | 1594   | Cell culture |                        |                                  |                  |
| 501 | 481210     | >Cholestane                                                                  | 1610   | Cell culture |                        |                                  |                  |
| 502 | EPA-281138 | >d-Norandrostane (5 $\ddagger$ ,14 $\ddagger$ )                              | 1611   | Cell culture |                        |                                  |                  |
| 503 | EPA-374744 | >Niacinamide, N-tert.-butyldimethylsilyl-                                    | 1615   | Cell culture |                        |                                  |                  |
| 504 | EPA-309180 | >Sulfurous acid, butyl tridecyl ester                                        | 1616   | Cell culture |                        |                                  |                  |
| 505 | 609234     | >Phenol, 2,4,6-triiodo-                                                      | 1632   | Cell culture |                        |                                  |                  |
| 506 | 6736998    | pentakis-O-(trimethylsilyl)-, D-                                             | 1645   | Cell culture |                        |                                  |                  |
| 507 | 19127152   | 2,3,4,5-tetrakis-O-(trimethylsilyl)-, L-                                     | 1650   | Cell culture |                        |                                  |                  |
| 508 | EPA-367670 | ethoxyethoxy)hexadecyloxy-                                                   | 1654   | Cell culture |                        |                                  |                  |
| 509 | 1888579    | dimethyl-                                                                    | 1657   | Cell culture |                        |                                  |                  |

|     | A          | B                                         | C             | D                  | E                             | F                                       | G                       |
|-----|------------|-------------------------------------------|---------------|--------------------|-------------------------------|-----------------------------------------|-------------------------|
| 1   | <b>CAS</b> | <b>AMDIS Annotation</b>                   | <b>RT (s)</b> | <b>Environment</b> | <b>Kovats retention index</b> | <b>Golm predicted functional groups</b> | <b>BinBase splashID</b> |
| 510 | EPA-309193 | >Sulfurous acid, decyl 2-ethylhexyl ester | 1695          | Cell culture       |                               |                                         |                         |
| 511 | 20633038   | trimethyl-                                | 1733          | Cell culture       |                               |                                         |                         |
| 512 | 71239151   | tetrahydrofurylmethyl ester               | 1737          | Cell culture       |                               |                                         |                         |
| 513 | EPA-363960 | diethylheptyloxyoctadecyloxy-             | 1816          | Cell culture       |                               |                                         |                         |
